# Supplementary material for: Using one–to–many urine proteome comparisons to provide clues for fever of unknown origin
Source: bioRxiv or medRxiv preprint supplement (doi:10.1101/2021.09.23.21264016), 2021-09-24
Supplement: Supplementary file [file media-1.pdf]

| F1                 |             |          |
|--------------------|-------------|----------|
| Protein Accessions | Fold Change | P value  |
| P02750             | 21.74       | 8.95E-09 |
| Q15293             | 17.17       | 3.30E-06 |
| P02763             | 8.01        | 5.50E-05 |
| P01911             | 7.89        | 8.39E-06 |
| P61769             | 6.57        | 7.68E-05 |
| P02741             | 5.98        | 1.14E-06 |
| P01903             | 5.50        | 1.92E-02 |
| Q14764             | 5.30        | 3.18E-05 |
| P02511             | 5.20        | 7.86E-05 |
| P01225             | 4.81        | 3.36E-03 |
| P00915             | 4.34        | 2.73E-02 |
| P01860             | 4.34        | 1.26E-02 |
| P02792             | 4.14        | 4.77E-03 |
| P01019             | 4.13        | 7.68E-05 |
| P27824             | 4.03        | 3.36E-03 |
| Q86YZ3             | 4.03        | 3.60E-02 |
| P18428             | 3.87        | 9.36E-05 |
| O60271             | 3.80        | 1.28E-03 |
| P62195             | 3.79        | 8.38E-05 |
| P50225             | 3.67        | 2.30E-02 |
| P02656             | 3.62        | 1.01E-02 |
| Q08830             | 3.61        | 5.51E-03 |
| Q14117             | 3.55        | 5.50E-05 |
| P09210             | 3.47        | 4.65E-04 |
| P14550             | 3.43        | 4.28E-04 |
| Q969H8             | 3.38        | 2.30E-02 |
| O14966             | 3.32        | 1.35E-03 |
| P09237             | 3.31        | 5.52E-03 |
| P01011             | 3.31        | 1.35E-03 |
| Q9NY33             | 3.27        | 3.65E-02 |
| P17858             | 3.20        | 5.44E-04 |
| P02748             | 3.06        | 3.24E-04 |
| Q9HCE6             | 3.03        | 8.62E-04 |
| P34913             | 2.98        | 4.86E-02 |
| Q7L5L3             | 2.97        | 1.27E-02 |
| Q5JTV8             | 2.96        | 1.06E-02 |
| P25705             | 2.91        | 4.39E-02 |

|        |      |          |
|--------|------|----------|
| Q9UHI7 | 2.86 | 2.18E-03 |
| P28838 | 2.85 | 5.51E-03 |
| P23526 | 2.78 | 1.25E-03 |
| Q99972 | 2.70 | 1.37E-02 |
| P34896 | 2.69 | 1.17E-03 |
| P19652 | 2.67 | 2.53E-02 |
| P08571 | 2.63 | 2.30E-02 |
| O00754 | 2.63 | 1.35E-03 |
| Q9Y547 | 2.62 | 8.79E-03 |
| P50570 | 2.62 | 2.29E-03 |
| P25774 | 2.61 | 6.70E-03 |
| P50053 | 2.57 | 2.18E-03 |
| Q9BTY2 | 2.57 | 5.15E-03 |
| Q16851 | 2.57 | 2.13E-03 |
| P46926 | 2.57 | 1.26E-02 |
| P59998 | 2.54 | 9.37E-03 |
| Q8TDQ1 | 2.48 | 9.00E-03 |
| P22223 | 2.45 | 2.10E-02 |
| P20711 | 2.43 | 2.18E-02 |
| Q96DG6 | 2.41 | 5.15E-03 |
| Q9HD89 | 2.38 | 6.11E-03 |
| Q8NCC3 | 2.35 | 1.32E-02 |
| Q93099 | 2.34 | 1.90E-02 |
| P08253 | 2.33 | 4.25E-02 |
| Q96H15 | 2.32 | 2.93E-02 |
| P61026 | 2.27 | 5.75E-05 |
| Q6PK18 | 2.27 | 1.62E-02 |
| P07359 | 2.27 | 2.87E-02 |
| P21399 | 2.25 | 1.32E-02 |
| P09327 | 2.24 | 3.92E-02 |
| Q9P1F3 | 2.21 | 4.19E-02 |
| P78371 | 2.19 | 1.59E-02 |
| P20774 | 2.19 | 4.80E-02 |
| P51580 | 2.17 | 1.42E-02 |
| Q3LXA3 | 2.16 | 4.25E-02 |
| P02790 | 2.16 | 6.31E-03 |
| Q9Y617 | 2.14 | 9.98E-03 |
| Q6UX27 | 2.12 | 3.36E-03 |
| P11586 | 2.11 | 5.15E-03 |

|        |      |          |
|--------|------|----------|
| Q8NHJ6 | 2.09 | 3.27E-02 |
| O75936 | 2.09 | 2.25E-02 |
| P08185 | 2.08 | 7.24E-03 |
| Q9NTK5 | 2.07 | 3.55E-02 |
| P0DMV8 | 2.07 | 3.65E-02 |
| Q9UBR2 | 2.05 | 1.67E-04 |
| P49368 | 2.04 | 1.75E-02 |
| P40925 | 2.00 | 3.78E-03 |
| P04066 | 2.00 | 9.00E-03 |
| Q8N386 | 0.50 | 4.13E-02 |
| P20933 | 0.50 | 3.31E-02 |
| Q6UX71 | 0.49 | 3.42E-02 |
| Q9UQB8 | 0.46 | 5.72E-03 |
| Q92859 | 0.46 | 3.60E-02 |
| P10586 | 0.45 | 9.00E-03 |
| Q99835 | 0.44 | 2.73E-02 |
| Q96JQ0 | 0.43 | 4.84E-02 |
| Q15223 | 0.40 | 2.36E-02 |
| Q9UBG0 | 0.40 | 1.92E-02 |
| P30086 | 0.39 | 4.84E-02 |
| P25940 | 0.34 | 4.19E-02 |
| Q13445 | 0.34 | 5.51E-03 |
| P19256 | 0.34 | 3.65E-02 |
| O75347 | 0.34 | 3.84E-02 |
| P13987 | 0.34 | 3.80E-02 |
| Q9HCU0 | 0.33 | 3.80E-02 |
| Q12864 | 0.32 | 4.84E-02 |
| P11047 | 0.32 | 1.85E-02 |
| Q9GZM5 | 0.30 | 4.58E-02 |
| Q9UNN8 | 0.25 | 2.52E-03 |
| O75339 | 0.23 | 3.92E-02 |
| Q9BWV1 | 0.18 | 2.27E-02 |

| F2                 |             |          |
|--------------------|-------------|----------|
| Protein Accessions | Fold Change | P value  |
| Q9Y547             | 15.88       | 1.00E-06 |
| P61769             | 15.13       | 3.84E-06 |
| O00244             | 14.16       | 5.23E-06 |
| Q9H299             | 13.13       | 1.75E-05 |
| Q15293             | 10.99       | 3.63E-03 |
| P00915             | 10.99       | 6.04E-05 |
| Q9NWW4             | 9.17        | 1.19E-05 |
| Q8NHJ6             | 8.79        | 1.98E-06 |
| P02750             | 8.28        | 1.32E-05 |
| O75368             | 8.23        | 3.84E-06 |
| P05534             | 8.18        | 3.84E-06 |
| P52272             | 8.11        | 5.59E-04 |
| Q9P1F3             | 6.57        | 7.90E-06 |
| P04080             | 6.54        | 3.14E-03 |
| P12318             | 6.27        | 1.47E-04 |
| P30508             | 6.15        | 4.28E-05 |
| Q96H15             | 6.09        | 1.32E-05 |
| O75531             | 5.83        | 1.32E-05 |
| P18465             | 5.66        | 1.32E-05 |
| P11684             | 5.48        | 2.44E-02 |
| O60234             | 5.08        | 1.12E-04 |
| Q92530             | 5.08        | 2.17E-02 |
| Q9Y6R1             | 4.99        | 2.11E-04 |
| Q9UHY7             | 4.98        | 2.97E-05 |
| Q9UBR2             | 4.84        | 1.32E-05 |
| Q9NRX4             | 4.77        | 4.72E-03 |
| P20774             | 4.65        | 1.16E-04 |
| P02763             | 4.57        | 5.34E-04 |
| Q86VP6             | 4.52        | 5.13E-04 |
| P02655             | 4.24        | 4.44E-04 |
| P36222             | 4.24        | 1.47E-04 |
| P16189             | 4.16        | 7.70E-04 |
| Q496F6             | 4.11        | 1.12E-04 |
| P25774             | 4.10        | 1.47E-04 |
| P01717             | 4.04        | 5.05E-05 |
| Q8TDQ1             | 4.03        | 1.31E-04 |
| P20333             | 3.99        | 4.83E-03 |

|        |      |          |
|--------|------|----------|
| P35270 | 3.99 | 6.42E-03 |
| Q14019 | 3.83 | 7.70E-04 |
| Q9UHI7 | 3.83 | 1.12E-04 |
| P02656 | 3.83 | 3.80E-03 |
| Q93091 | 3.82 | 1.93E-03 |
| Q13740 | 3.79 | 6.87E-05 |
| P55786 | 3.71 | 1.09E-03 |
| Q9H3K6 | 3.70 | 4.80E-02 |
| Q13867 | 3.68 | 3.72E-04 |
| O43707 | 3.65 | 1.17E-03 |
| O95497 | 3.62 | 3.18E-03 |
| P04233 | 3.61 | 4.67E-03 |
| P01903 | 3.60 | 3.85E-02 |
| Q9Y279 | 3.51 | 9.18E-03 |
| O00754 | 3.50 | 7.98E-05 |
| P07737 | 3.47 | 1.50E-04 |
| P02792 | 3.46 | 1.00E-02 |
| P27824 | 3.43 | 6.38E-03 |
| P19652 | 3.42 | 3.18E-03 |
| O43491 | 3.41 | 3.80E-03 |
| Q8N357 | 3.38 | 1.01E-03 |
| Q07075 | 3.37 | 4.80E-02 |
| Q13113 | 3.33 | 2.48E-03 |
| Q03405 | 3.32 | 1.78E-03 |
| Q13421 | 3.23 | 2.77E-02 |
| Q9NZT2 | 3.21 | 2.01E-02 |
| Q15084 | 3.21 | 5.86E-03 |
| Q9BXP8 | 3.11 | 4.73E-03 |
| Q969H8 | 3.05 | 2.77E-02 |
| O15204 | 3.05 | 1.32E-02 |
| P06454 | 2.99 | 1.80E-02 |
| P05023 | 2.98 | 7.09E-04 |
| Q7L5L3 | 2.92 | 1.40E-02 |
| P07237 | 2.91 | 3.25E-02 |
| Q5JTV8 | 2.90 | 6.38E-03 |
| Q9UHI8 | 2.89 | 3.93E-02 |
| Q96C19 | 2.88 | 1.90E-02 |
| Q15274 | 2.87 | 2.32E-02 |
| Q6UXN8 | 2.83 | 2.32E-03 |

|        |      |          |
|--------|------|----------|
| P36980 | 2.80 | 1.39E-02 |
| Q9NUM4 | 2.80 | 1.36E-02 |
| O75022 | 2.79 | 4.83E-03 |
| Q8NCC3 | 2.78 | 2.32E-03 |
| P02511 | 2.77 | 6.26E-03 |
| Q9BTM9 | 2.76 | 4.86E-03 |
| Q15116 | 2.75 | 2.72E-04 |
| P35754 | 2.74 | 3.85E-02 |
| P01019 | 2.73 | 1.01E-03 |
| Q92542 | 2.69 | 3.12E-02 |
| P08729 | 2.66 | 1.68E-03 |
| A0PJK1 | 2.61 | 2.29E-02 |
| Q96IU4 | 2.58 | 2.32E-02 |
| Q9Y6X5 | 2.57 | 6.86E-03 |
| Q15121 | 2.54 | 2.96E-02 |
| P53634 | 2.52 | 3.80E-04 |
| P02671 | 2.51 | 2.06E-02 |
| Q9H665 | 2.50 | 3.07E-03 |
| P01011 | 2.50 | 8.13E-03 |
| O00182 | 2.49 | 2.34E-03 |
| Q03167 | 2.49 | 1.08E-02 |
| P07686 | 2.47 | 3.07E-03 |
| P22223 | 2.47 | 1.38E-02 |
| P08571 | 2.46 | 2.50E-02 |
| P07858 | 2.44 | 5.30E-03 |
| P12111 | 2.42 | 4.33E-02 |
| P30043 | 2.41 | 3.32E-02 |
| Q695T7 | 2.37 | 3.54E-02 |
| P00746 | 2.35 | 3.25E-02 |
| P78310 | 2.35 | 3.87E-02 |
| P07900 | 2.34 | 4.80E-02 |
| P07339 | 2.34 | 1.17E-03 |
| P01700 | 2.32 | 2.32E-02 |
| P62942 | 2.32 | 2.32E-02 |
| P26368 | 2.30 | 2.29E-02 |
| P67809 | 2.28 | 5.00E-02 |
| P0CG47 | 2.27 | 2.77E-02 |
| Q9UHG2 | 2.26 | 1.80E-02 |
| P29401 | 2.25 | 3.06E-02 |

|        |      |          |
|--------|------|----------|
| Q9Y5Y7 | 2.24 | 4.33E-02 |
| P00740 | 2.22 | 3.86E-02 |
| Q86VB7 | 2.19 | 1.14E-03 |
| P09668 | 2.18 | 9.18E-03 |
| P04216 | 2.18 | 3.44E-04 |
| Q6GTX8 | 2.17 | 1.78E-03 |
| P00450 | 2.17 | 3.63E-02 |
| Q1EHB4 | 2.17 | 3.85E-02 |
| Q5T2W1 | 2.15 | 4.83E-03 |
| O75608 | 2.14 | 3.86E-03 |
| P04066 | 2.13 | 3.44E-03 |
| P01589 | 2.12 | 3.32E-02 |
| Q7Z6A9 | 2.10 | 3.26E-02 |
| P21333 | 2.09 | 1.90E-02 |
| P06865 | 2.05 | 3.99E-03 |
| P0DOX8 | 2.05 | 3.34E-02 |
| Q9Y5E6 | 0.47 | 4.33E-02 |
| Q9NZ53 | 0.46 | 1.90E-02 |
| O60494 | 0.45 | 2.77E-02 |
| Q9UNN8 | 0.45 | 7.89E-03 |
| O75882 | 0.45 | 4.07E-02 |
| Q6UXB4 | 0.43 | 7.40E-03 |
| Q8TB96 | 0.42 | 2.57E-02 |
| Q7KYR7 | 0.42 | 2.96E-02 |
| Q9HCM3 | 0.42 | 3.52E-02 |
| P10586 | 0.41 | 4.72E-03 |
| Q6UX71 | 0.41 | 1.31E-02 |
| Q9UBG0 | 0.40 | 1.85E-02 |
| Q5SZK8 | 0.39 | 3.26E-02 |
| Q9NQS3 | 0.39 | 1.38E-02 |
| Q9HBR0 | 0.38 | 1.72E-02 |
| P13598 | 0.38 | 3.11E-02 |
| Q96JQ0 | 0.37 | 2.50E-02 |
| Q92673 | 0.36 | 4.23E-02 |
| P24855 | 0.36 | 3.44E-02 |
| Q13445 | 0.35 | 3.63E-03 |
| O75144 | 0.35 | 2.29E-02 |
| P51570 | 0.35 | 1.70E-02 |
| Q99835 | 0.35 | 1.10E-02 |

|        |      |          |
|--------|------|----------|
| P41217 | 0.34 | 4.46E-02 |
| P15151 | 0.34 | 3.74E-02 |
| Q9UN37 | 0.33 | 3.87E-02 |
| Q9UK41 | 0.33 | 3.86E-02 |
| P04180 | 0.33 | 1.90E-02 |
| Q86YT9 | 0.32 | 4.07E-02 |
| Q92859 | 0.32 | 9.18E-03 |
| Q96MU8 | 0.31 | 4.80E-02 |
| P0C7U0 | 0.30 | 4.21E-02 |
| P31025 | 0.30 | 2.35E-02 |
| Q6UXG3 | 0.29 | 3.14E-02 |
| Q86VN1 | 0.29 | 1.88E-02 |
| Q9H1U4 | 0.28 | 4.80E-02 |
| Q9BWV1 | 0.28 | 2.77E-02 |
| Q9HCU0 | 0.27 | 2.15E-02 |
| P11047 | 0.25 | 7.84E-03 |
| Q8NDA2 | 0.23 | 4.80E-02 |
| Q8IUL8 | 0.18 | 2.29E-02 |
| P12273 | 0.12 | 4.07E-02 |
| P55017 | 0.11 | 2.35E-02 |



| F3                 |             |          |
|--------------------|-------------|----------|
| Protein Accessions | Fold Change | P value  |
| P04279             | 34.12       | 9.11E-09 |
| Q02383             | 27.48       | 5.32E-08 |
| Q15293             | 7.67        | 1.68E-04 |
| P14555             | 6.70        | 1.68E-04 |
| Q6W4X9             | 6.44        | 1.48E-03 |
| P02763             | 5.67        | 2.80E-04 |
| P02750             | 5.51        | 3.76E-04 |
| O76070             | 4.54        | 1.79E-03 |
| P01721             | 3.95        | 4.56E-03 |
| P02679             | 3.93        | 4.00E-02 |
| P01024             | 3.79        | 1.98E-03 |
| Q969H8             | 3.76        | 1.53E-02 |
| Q13113             | 3.68        | 8.07E-04 |
| P09237             | 3.67        | 4.01E-03 |
| P01225             | 3.60        | 2.67E-02 |
| P25311             | 3.51        | 3.54E-02 |
| Q86VP6             | 3.37        | 2.45E-03 |
| P02776             | 3.37        | 3.14E-03 |
| A0A075B6K4         | 3.25        | 4.78E-02 |
| Q8N114             | 3.02        | 4.78E-02 |
| Q9P1F3             | 3.00        | 6.17E-03 |
| Q9Y6R1             | 2.99        | 1.93E-02 |
| O75368             | 2.88        | 1.20E-02 |
| Q9UBR2             | 2.88        | 7.06E-06 |
| Q9UHI7             | 2.85        | 2.65E-03 |
| P19652             | 2.81        | 2.31E-02 |
| A0PJK1             | 2.80        | 4.01E-02 |
| P09543             | 2.77        | 1.48E-03 |
| Q8TDQ1             | 2.69        | 6.17E-03 |
| Q9BYE9             | 2.65        | 7.77E-03 |
| P02790             | 2.46        | 2.74E-03 |
| P01699             | 2.40        | 8.07E-03 |
| P02748             | 2.38        | 4.01E-03 |
| P50897             | 2.37        | 5.36E-04 |
| P08253             | 2.36        | 4.78E-02 |
| P07339             | 2.32        | 2.74E-03 |
| P08603             | 2.32        | 1.67E-03 |

|        |      |          |
|--------|------|----------|
| P18428 | 2.30 | 1.14E-02 |
| Q13510 | 2.27 | 4.01E-03 |
| P07996 | 2.24 | 2.45E-03 |
| P01717 | 2.19 | 1.20E-02 |
| P09668 | 2.18 | 1.93E-02 |
| P07686 | 2.14 | 1.93E-02 |
| P02741 | 2.11 | 7.20E-03 |
| Q9HAT2 | 2.10 | 1.93E-02 |
| Q07507 | 2.09 | 1.67E-03 |
| O14786 | 2.06 | 3.36E-02 |
| P53634 | 2.06 | 6.11E-03 |
| P01344 | 2.06 | 4.78E-02 |
| Q92743 | 2.04 | 1.81E-02 |
| Q13445 | 0.49 | 1.93E-02 |
| P43121 | 0.42 | 1.99E-02 |
| P11047 | 0.42 | 4.92E-02 |
| Q92520 | 0.40 | 4.78E-02 |
| Q9NU53 | 0.37 | 4.78E-02 |
| Q9UNN8 | 0.36 | 7.77E-03 |
| P12955 | 0.35 | 4.78E-02 |
| Q92859 | 0.31 | 1.71E-02 |
| Q14118 | 0.29 | 4.13E-02 |
| Q9UJJ9 | 0.26 | 4.78E-02 |
| Q8N386 | 0.25 | 1.01E-02 |
| Q9H0X4 | 0.25 | 4.25E-02 |
| Q14117 | 0.21 | 3.27E-02 |
| P45877 | 0.15 | 3.24E-02 |
| Q8TB96 | 0.13 | 8.03E-03 |

| F4                 |             |          |
|--------------------|-------------|----------|
| Protein Accessions | Fold Change | P value  |
| P02792             | 14.92       | 1.18E-05 |
| Q14764             | 11.70       | 8.23E-06 |
| P02679             | 11.42       | 7.61E-05 |
| P02675             | 9.76        | 5.93E-05 |
| P01903             | 8.93        | 9.91E-05 |
| Q07075             | 8.09        | 1.19E-04 |
| O60271             | 7.96        | 8.23E-06 |
| Q9HCE6             | 7.80        | 2.25E-06 |
| P01023             | 7.21        | 5.01E-04 |
| P01911             | 6.93        | 1.91E-02 |
| Q14204             | 6.73        | 4.00E-04 |
| P50570             | 6.72        | 2.69E-06 |
| Q9ULZ3             | 6.71        | 1.98E-03 |
| P00966             | 6.66        | 4.14E-06 |
| P17858             | 6.37        | 2.69E-06 |
| P06727             | 6.30        | 2.31E-04 |
| Q9Y6X5             | 6.28        | 1.53E-04 |
| P02794             | 6.07        | 1.72E-03 |
| Q07837             | 5.94        | 8.23E-06 |
| Q16851             | 5.84        | 8.23E-06 |
| Q9BR76             | 5.77        | 6.57E-04 |
| P34913             | 5.72        | 1.15E-03 |
| Q6UWR7             | 5.63        | 2.63E-04 |
| P00439             | 5.58        | 2.51E-04 |
| O95954             | 5.24        | 4.51E-05 |
| P21399             | 5.17        | 7.01E-05 |
| O75891             | 5.16        | 4.14E-06 |
| Q3LXA3             | 5.16        | 1.17E-04 |
| Q9H2A2             | 5.12        | 6.43E-05 |
| O95154             | 5.12        | 1.93E-04 |
| Q9Y2T3             | 5.06        | 2.38E-04 |
| P11586             | 5.00        | 2.49E-05 |
| P02511             | 4.99        | 8.73E-05 |
| Q9UHL4             | 4.97        | 2.70E-04 |
| P07900             | 4.93        | 8.90E-05 |
| P40925             | 4.89        | 8.23E-06 |
| Q15274             | 4.88        | 2.86E-04 |

|        |      |          |
|--------|------|----------|
| P28838 | 4.87 | 1.09E-04 |
| Q9Y617 | 4.87 | 1.61E-05 |
| Q15293 | 4.84 | 2.52E-02 |
| P62195 | 4.81 | 8.77E-05 |
| Q9HB90 | 4.77 | 1.10E-03 |
| O14841 | 4.75 | 7.57E-03 |
| P61026 | 4.71 | 9.55E-06 |
| Q99832 | 4.70 | 8.90E-05 |
| Q7L5L3 | 4.63 | 1.87E-04 |
| Q06495 | 4.58 | 2.11E-03 |
| Q9NUM4 | 4.57 | 1.87E-04 |
| P49368 | 4.56 | 8.87E-05 |
| Q96DG6 | 4.54 | 1.61E-05 |
| O75936 | 4.51 | 5.44E-05 |
| P02656 | 4.48 | 5.53E-04 |
| P04114 | 4.43 | 4.84E-04 |
| P08133 | 4.41 | 1.91E-04 |
| Q9UBR1 | 4.38 | 7.32E-04 |
| P02763 | 4.36 | 3.50E-04 |
| Q9NVS9 | 4.35 | 3.82E-04 |
| Q5R3I4 | 4.30 | 1.50E-05 |
| P02647 | 4.29 | 2.98E-02 |
| P02750 | 4.24 | 2.20E-04 |
| Q53T59 | 4.24 | 5.17E-04 |
| P14550 | 4.22 | 4.27E-05 |
| P05062 | 4.18 | 2.95E-05 |
| Q92747 | 4.16 | 1.86E-04 |
| P50053 | 4.16 | 8.64E-03 |
| Q96KP4 | 4.13 | 2.55E-04 |
| P61160 | 4.10 | 6.02E-05 |
| P08237 | 4.09 | 3.37E-04 |
| P02652 | 4.08 | 1.61E-02 |
| Q14117 | 4.05 | 8.23E-06 |
| P32189 | 4.03 | 8.26E-04 |
| P53634 | 4.01 | 8.23E-06 |
| P28332 | 4.01 | 1.09E-04 |
| P49773 | 3.98 | 4.60E-03 |
| P17980 | 3.97 | 7.50E-04 |
| Q9P1F3 | 3.93 | 1.37E-04 |

|        |      |          |
|--------|------|----------|
| Q6ZQN7 | 3.93 | 4.82E-05 |
| Q9Y5S2 | 3.92 | 1.66E-03 |
| Q93050 | 3.92 | 2.95E-05 |
| P30039 | 3.91 | 3.29E-04 |
| P09210 | 3.91 | 7.01E-05 |
| P62333 | 3.90 | 9.08E-03 |
| Q92542 | 3.87 | 1.04E-03 |
| O43776 | 3.84 | 1.43E-03 |
| Q93099 | 3.84 | 2.63E-04 |
| P00746 | 3.82 | 8.14E-04 |
| Q93091 | 3.80 | 1.47E-03 |
| Q13200 | 3.79 | 3.15E-03 |
| P21695 | 3.78 | 3.28E-04 |
| Q8N2U0 | 3.77 | 1.10E-02 |
| Q9Y2S2 | 3.77 | 1.87E-04 |
| O43488 | 3.71 | 4.82E-05 |
| P51606 | 3.67 | 4.82E-05 |
| P68133 | 3.67 | 1.61E-05 |
| P19823 | 3.66 | 2.09E-02 |
| P02654 | 3.65 | 3.82E-04 |
| O00338 | 3.64 | 3.52E-03 |
| P34896 | 3.62 | 3.63E-05 |
| P09327 | 3.61 | 6.58E-04 |
| P12955 | 3.60 | 1.61E-05 |
| O14966 | 3.56 | 1.91E-04 |
| O15144 | 3.56 | 1.91E-04 |
| Q13277 | 3.56 | 1.48E-05 |
| P78371 | 3.53 | 6.58E-04 |
| P02655 | 3.51 | 8.86E-03 |
| Q96FL8 | 3.51 | 1.68E-03 |
| Q14019 | 3.48 | 1.08E-03 |
| B5ME19 | 3.46 | 5.97E-03 |
| P51580 | 3.46 | 8.73E-05 |
| P35542 | 3.45 | 3.24E-02 |
| Q14847 | 3.45 | 8.96E-05 |
| O75264 | 3.41 | 8.90E-05 |
| Q9Y547 | 3.41 | 8.50E-04 |
| P11766 | 3.37 | 5.81E-04 |
| P60953 | 3.37 | 5.17E-04 |

|        |      |          |
|--------|------|----------|
| Q15833 | 3.37 | 8.96E-05 |
| P61158 | 3.37 | 1.87E-04 |
| Q86VP6 | 3.36 | 3.57E-04 |
| P07858 | 3.34 | 1.87E-04 |
| Q06278 | 3.33 | 2.04E-03 |
| P24534 | 3.30 | 1.05E-02 |
| Q5T2W1 | 3.29 | 7.90E-05 |
| O00754 | 3.25 | 8.11E-05 |
| P45381 | 3.25 | 3.39E-03 |
| Q9UHI7 | 3.24 | 2.66E-04 |
| P09668 | 3.23 | 1.55E-04 |
| P17900 | 3.22 | 1.88E-02 |
| P19652 | 3.22 | 2.24E-03 |
| P27105 | 3.22 | 1.16E-03 |
| Q9UJ68 | 3.21 | 1.91E-04 |
| Q96BW5 | 3.20 | 1.10E-03 |
| Q96FV2 | 3.20 | 1.87E-04 |
| P34932 | 3.17 | 1.05E-04 |
| P20711 | 3.16 | 7.62E-04 |
| P46926 | 3.16 | 6.75E-04 |
| P48643 | 3.16 | 5.05E-03 |
| P50502 | 3.14 | 1.87E-04 |
| P63261 | 3.12 | 1.35E-04 |
| Q9H2M3 | 3.07 | 9.81E-03 |
| Q9BUT1 | 3.06 | 1.54E-03 |
| P13798 | 3.01 | 5.53E-04 |
| Q9UHY7 | 3.00 | 1.11E-03 |
| P13716 | 2.99 | 4.25E-03 |
| Q93088 | 2.99 | 9.75E-03 |
| P17050 | 2.98 | 1.69E-04 |
| Q9UM54 | 2.98 | 3.46E-02 |
| P25311 | 2.96 | 2.47E-02 |
| O75083 | 2.95 | 8.35E-04 |
| P30711 | 2.95 | 3.15E-02 |
| Q03154 | 2.94 | 2.44E-03 |
| O00244 | 2.93 | 4.35E-02 |
| Q9UBR2 | 2.93 | 8.23E-06 |
| P55072 | 2.92 | 4.64E-03 |
| P17405 | 2.92 | 7.01E-05 |

|                   |      |          |
|-------------------|------|----------|
| P50990            | 2.92 | 1.99E-03 |
| Q00610            | 2.92 | 7.40E-03 |
| Q9NWW4            | 2.90 | 1.28E-02 |
| O43707            | 2.88 | 2.83E-03 |
| P31153            | 2.88 | 1.37E-03 |
| P23526            | 2.87 | 1.87E-04 |
| Q01518            | 2.87 | 5.84E-03 |
| P59998            | 2.86 | 1.23E-03 |
| P45974            | 2.85 | 4.82E-05 |
| P49189            | 2.85 | 6.34E-04 |
| Q9H4A4            | 2.83 | 4.01E-02 |
| P09525            | 2.82 | 1.99E-03 |
| Q9UBQ7            | 2.80 | 1.35E-03 |
| Q9UJU6            | 2.78 | 9.45E-03 |
| SWISS-PROT:P10096 | 2.78 | 1.93E-04 |
| O15143            | 2.77 | 4.60E-02 |
| Q9BPX5            | 2.77 | 5.07E-03 |
| A0A0C4DH24        | 2.76 | 2.66E-02 |
| P09467            | 2.75 | 1.02E-02 |
| Q14914            | 2.75 | 2.72E-03 |
| Q9NTX5            | 2.73 | 1.35E-03 |
| P07148            | 2.73 | 3.39E-03 |
| Q7L9L4            | 2.73 | 6.64E-03 |
| P25774            | 2.72 | 1.40E-03 |
| Q9NTK5            | 2.71 | 1.95E-03 |
| P10636            | 2.71 | 5.09E-03 |
| P08473            | 2.70 | 1.28E-02 |
| P27487            | 2.70 | 8.14E-04 |
| P10768            | 2.70 | 3.62E-04 |
| P51570            | 2.70 | 1.53E-04 |
| P53396            | 2.70 | 3.62E-03 |
| Q6XQN6            | 2.69 | 3.99E-03 |
| P02747            | 2.68 | 2.48E-03 |
| O43681            | 2.67 | 1.87E-04 |
| Q9Y6R1            | 2.65 | 1.28E-02 |
| O75348            | 2.64 | 2.18E-03 |
| P27824            | 2.64 | 1.86E-02 |
| P52758            | 2.64 | 2.92E-02 |
| P54803            | 2.62 | 4.19E-04 |

|            |      |          |
|------------|------|----------|
| Q13183     | 2.62 | 7.50E-04 |
| Q9UI12     | 2.62 | 1.90E-03 |
| Q16186     | 2.59 | 1.50E-02 |
| Q8WWA0     | 2.59 | 4.35E-02 |
| P08183     | 2.57 | 1.17E-03 |
| P54793     | 2.56 | 1.84E-02 |
| A0PJK1     | 2.53 | 6.15E-03 |
| P35558     | 2.51 | 4.46E-03 |
| Q06323     | 2.51 | 3.61E-03 |
| P13796     | 2.51 | 3.73E-02 |
| P60900     | 2.50 | 9.42E-03 |
| Q9Y281     | 2.50 | 6.15E-03 |
| O15511     | 2.47 | 1.87E-02 |
| P04406     | 2.46 | 9.39E-04 |
| Q1EHB4     | 2.46 | 1.30E-02 |
| P35998     | 2.45 | 7.43E-03 |
| Q99536     | 2.45 | 9.26E-03 |
| P13639     | 2.44 | 1.80E-02 |
| P00338     | 2.43 | 7.37E-03 |
| P23528     | 2.42 | 1.52E-03 |
| P67809     | 2.41 | 4.87E-02 |
| Q13510     | 2.40 | 4.19E-04 |
| Q8NCW5     | 2.39 | 4.50E-03 |
| P00441     | 2.39 | 2.44E-03 |
| O96009     | 2.39 | 7.77E-03 |
| Q9BTY2     | 2.39 | 2.51E-03 |
| Q9NS93     | 2.38 | 3.23E-02 |
| P00558     | 2.38 | 3.19E-04 |
| P36871     | 2.38 | 1.97E-02 |
| Q08257     | 2.36 | 6.24E-03 |
| O00401     | 2.36 | 8.76E-03 |
| A0A0C4DH38 | 2.35 | 7.77E-03 |
| P30085     | 2.35 | 1.68E-02 |
| A6NIZ1     | 2.34 | 9.06E-03 |
| Q9NVJ2     | 2.33 | 3.74E-02 |
| P61981     | 2.31 | 3.48E-02 |
| O00115     | 2.30 | 2.34E-03 |
| O14818     | 2.29 | 2.45E-03 |
| Q6UWV6     | 2.29 | 5.36E-03 |



|        |      |          |
|--------|------|----------|
| P32754 | 2.29 | 1.47E-02 |
| Q9H008 | 2.28 | 4.13E-04 |
| P47755 | 2.27 | 8.10E-03 |
| Q9Y646 | 2.27 | 7.77E-03 |
| P61006 | 2.25 | 2.07E-02 |
| P10619 | 2.25 | 3.61E-03 |
| P00352 | 2.24 | 9.93E-03 |
| Q08830 | 2.24 | 3.88E-02 |
| Q86X76 | 2.24 | 5.85E-03 |
| Q04917 | 2.23 | 3.74E-02 |
| Q13228 | 2.23 | 4.67E-03 |
| Q9C0H2 | 2.22 | 2.80E-02 |
| Q7Z3F1 | 2.22 | 4.93E-02 |
| P01024 | 2.21 | 2.23E-02 |
| P60981 | 2.21 | 7.92E-03 |
| Q96C19 | 2.21 | 4.69E-02 |
| P31946 | 2.21 | 5.66E-03 |
| Q9NQR4 | 2.20 | 1.13E-02 |
| P01717 | 2.20 | 3.85E-03 |
| Q13113 | 2.20 | 1.78E-02 |
| Q14194 | 2.19 | 3.10E-03 |
| P00491 | 2.19 | 1.78E-02 |
| P30153 | 2.19 | 7.17E-03 |
| P06744 | 2.18 | 2.04E-03 |
| P48637 | 2.17 | 9.94E-03 |
| Q9P2T1 | 2.17 | 1.90E-03 |
| P08603 | 2.15 | 6.29E-04 |
| P47756 | 2.15 | 3.62E-03 |
| Q495M3 | 2.15 | 5.66E-03 |
| O15145 | 2.15 | 2.36E-02 |
| P08729 | 2.14 | 7.77E-03 |
| Q8N357 | 2.14 | 3.50E-02 |
| O94760 | 2.12 | 6.48E-04 |
| Q15493 | 2.12 | 5.84E-03 |
| P62942 | 2.11 | 2.33E-02 |
| P82980 | 2.11 | 3.94E-03 |
| P51688 | 2.10 | 4.32E-02 |
| P06733 | 2.10 | 9.93E-03 |
| P50395 | 2.10 | 3.62E-03 |

|        |      |          |
|--------|------|----------|
| P25789 | 2.09 | 1.38E-02 |
| P29401 | 2.08 | 3.76E-02 |
| Q9NR99 | 2.08 | 2.61E-02 |
| Q96LD4 | 2.08 | 2.91E-04 |
| Q8WWB7 | 2.05 | 5.78E-03 |
| P78417 | 2.03 | 6.93E-03 |
| P68104 | 2.02 | 1.75E-02 |
| P11142 | 2.01 | 1.04E-02 |
| O75309 | 0.50 | 3.18E-02 |
| O75594 | 0.49 | 6.39E-04 |
| Q08722 | 0.48 | 2.56E-02 |
| Q9UQB8 | 0.48 | 2.18E-03 |
| P10586 | 0.48 | 4.07E-03 |
| Q9UJJ9 | 0.48 | 4.62E-02 |
| O14498 | 0.48 | 4.24E-02 |
| Q9NPH3 | 0.48 | 4.35E-02 |
| P28827 | 0.47 | 2.53E-02 |
| Q9NZ53 | 0.47 | 9.94E-03 |
| Q6UX71 | 0.47 | 9.84E-03 |
| O60888 | 0.47 | 9.71E-03 |
| P07942 | 0.46 | 1.35E-02 |
| O94910 | 0.46 | 4.35E-02 |
| P55957 | 0.45 | 3.74E-02 |
| Q15223 | 0.45 | 1.22E-02 |
| Q99835 | 0.45 | 1.04E-02 |
| O43921 | 0.45 | 4.36E-02 |
| Q8NBS9 | 0.45 | 4.61E-02 |
| Q92520 | 0.44 | 1.78E-02 |
| P00734 | 0.44 | 4.89E-02 |
| P54760 | 0.44 | 3.47E-02 |
| O75882 | 0.44 | 1.96E-02 |
| P21709 | 0.43 | 2.82E-02 |
| Q06481 | 0.43 | 1.09E-02 |
| Q9GZM5 | 0.43 | 3.76E-02 |
| Q9H741 | 0.43 | 4.14E-02 |
| P55899 | 0.43 | 2.40E-02 |
| Q05707 | 0.42 | 3.07E-02 |
| P20138 | 0.42 | 1.82E-02 |
| Q13443 | 0.42 | 4.10E-02 |

|        |      |          |
|--------|------|----------|
| O43291 | 0.42 | 4.35E-02 |
| P25940 | 0.42 | 2.53E-02 |
| Q7LBR1 | 0.41 | 4.54E-02 |
| P78552 | 0.41 | 3.24E-02 |
| Q9HBR0 | 0.41 | 1.13E-02 |
| P19022 | 0.41 | 2.96E-02 |
| Q9Y4D7 | 0.40 | 2.45E-02 |
| P13611 | 0.40 | 4.22E-02 |
| Q06418 | 0.40 | 2.30E-02 |
| Q14118 | 0.40 | 2.06E-02 |
| P02741 | 0.40 | 2.52E-02 |
| P13591 | 0.40 | 3.90E-02 |
| P16234 | 0.40 | 3.54E-02 |
| P45877 | 0.40 | 3.20E-02 |
| P10646 | 0.40 | 3.03E-02 |
| Q08334 | 0.40 | 3.76E-02 |
| Q96J84 | 0.40 | 4.62E-02 |
| P26992 | 0.39 | 4.45E-02 |
| Q9NPR2 | 0.39 | 4.80E-03 |
| P22105 | 0.39 | 4.09E-02 |
| O95490 | 0.39 | 9.80E-03 |
| P40189 | 0.39 | 2.47E-02 |
| P04275 | 0.39 | 3.74E-02 |
| P08123 | 0.39 | 4.95E-02 |
| Q9P2B2 | 0.38 | 2.90E-02 |
| Q04721 | 0.38 | 4.98E-02 |
| P13598 | 0.38 | 1.59E-02 |
| Q8TDQ0 | 0.38 | 3.56E-02 |
| Q13445 | 0.38 | 2.03E-03 |
| Q9NY25 | 0.38 | 4.10E-02 |
| O75787 | 0.38 | 2.82E-02 |
| Q12913 | 0.37 | 4.20E-02 |
| Q6P531 | 0.37 | 2.59E-02 |
| P05067 | 0.37 | 4.52E-02 |
| Q99523 | 0.36 | 4.88E-02 |
| P52798 | 0.36 | 2.60E-02 |
| Q6UXB4 | 0.36 | 1.90E-03 |
| P02462 | 0.36 | 4.89E-02 |
| P09619 | 0.36 | 5.84E-03 |

|        |      |          |
|--------|------|----------|
| P0DMQ5 | 0.36 | 2.68E-02 |
| P20827 | 0.36 | 1.28E-02 |
| P19256 | 0.36 | 1.49E-02 |
| P11047 | 0.36 | 8.10E-03 |
| Q16832 | 0.35 | 2.61E-02 |
| Q9UKU6 | 0.35 | 1.93E-02 |
| Q969Z4 | 0.35 | 4.45E-02 |
| Q8TB96 | 0.35 | 7.70E-03 |
| Q8IZA0 | 0.35 | 2.58E-02 |
| Q9UBG0 | 0.35 | 4.18E-03 |
| Q68D85 | 0.34 | 1.82E-02 |
| Q15116 | 0.34 | 1.78E-02 |
| P16070 | 0.34 | 1.84E-02 |
| Q9UBP0 | 0.34 | 1.78E-02 |
| Q96RW7 | 0.34 | 3.59E-02 |
| Q9H9H4 | 0.33 | 4.35E-02 |
| Q96PD5 | 0.33 | 4.67E-02 |
| Q5ZPR3 | 0.33 | 2.68E-02 |
| O75339 | 0.32 | 2.46E-02 |
| P12259 | 0.32 | 1.87E-02 |
| P23284 | 0.32 | 2.30E-02 |
| Q9NZP8 | 0.32 | 2.39E-02 |
| O75084 | 0.32 | 9.24E-03 |
| Q5JXA9 | 0.32 | 1.80E-02 |
| Q13591 | 0.32 | 4.93E-02 |
| Q92673 | 0.32 | 1.78E-02 |
| Q9P0T7 | 0.31 | 3.98E-02 |
| Q9NPF0 | 0.31 | 2.29E-02 |
| Q08345 | 0.31 | 2.24E-02 |
| Q5SZK8 | 0.31 | 9.93E-03 |
| P41217 | 0.31 | 1.97E-02 |
| Q12860 | 0.31 | 4.43E-02 |
| Q8NDA2 | 0.31 | 3.87E-02 |
| O75144 | 0.31 | 9.75E-03 |
| Q96JQ0 | 0.31 | 8.30E-03 |
| P04180 | 0.31 | 7.77E-03 |
| O43278 | 0.31 | 9.64E-03 |
| Q9HCN6 | 0.31 | 4.35E-02 |
| Q15262 | 0.30 | 1.21E-02 |

|                   |      |          |
|-------------------|------|----------|
| Q8NC42            | 0.30 | 1.50E-02 |
| O43556            | 0.30 | 1.72E-02 |
| P15151            | 0.30 | 1.50E-02 |
| Q9BY67            | 0.30 | 4.67E-02 |
| P15291            | 0.29 | 1.13E-02 |
| Q7KYR7            | 0.29 | 5.85E-03 |
| P14784            | 0.29 | 2.40E-02 |
| Q9UN74            | 0.29 | 4.10E-02 |
| P08572            | 0.28 | 2.95E-02 |
| Q7Z7G0            | 0.28 | 3.51E-02 |
| Q9UNN8            | 0.28 | 8.26E-04 |
| Q9ULK6            | 0.28 | 2.36E-02 |
| Q9NQS3            | 0.28 | 2.61E-03 |
| Q9UEF7            | 0.28 | 4.35E-02 |
| Q6V0I7            | 0.27 | 3.66E-02 |
| Q9Y653            | 0.27 | 2.67E-02 |
| Q9HCM3            | 0.27 | 6.54E-03 |
| P26927            | 0.27 | 2.61E-02 |
| Q9NR34            | 0.26 | 3.76E-02 |
| P24855            | 0.26 | 9.71E-03 |
| Q92859            | 0.26 | 2.62E-03 |
| Q86YT9            | 0.25 | 1.47E-02 |
| Q9HCU0            | 0.25 | 8.64E-03 |
| Q9UBQ6            | 0.25 | 2.69E-02 |
| P0C7U0            | 0.24 | 1.68E-02 |
| P09603            | 0.24 | 3.76E-02 |
| Q8TBP5            | 0.24 | 2.68E-02 |
| Q9H0X4            | 0.24 | 9.80E-03 |
| SWISS-PROT:P19012 | 0.24 | 3.13E-02 |
| P58499            | 0.24 | 1.65E-02 |
| Q6UXG3            | 0.24 | 1.14E-02 |
| P98095            | 0.23 | 4.93E-02 |
| Q9Y5E6            | 0.23 | 4.18E-03 |
| P01042            | 0.23 | 3.85E-02 |
| Q9Y639            | 0.22 | 2.30E-02 |
| P16035            | 0.22 | 1.50E-02 |
| Q9HBB8            | 0.22 | 2.61E-02 |
| P35916            | 0.21 | 1.68E-02 |
| Q96MU8            | 0.21 | 1.50E-02 |

|        |      |          |
|--------|------|----------|
| Q9Y2G1 | 0.21 | 1.09E-02 |
| P80370 | 0.19 | 3.12E-02 |
| Q8IUL8 | 0.18 | 1.09E-02 |
| Q86UX2 | 0.18 | 2.68E-02 |
| P07451 | 0.17 | 4.15E-02 |
| Q9H1U4 | 0.17 | 1.09E-02 |
| P12109 | 0.17 | 3.86E-02 |
| P12273 | 0.17 | 2.68E-02 |
| Q8NBJ4 | 0.16 | 2.36E-02 |
| P31997 | 0.15 | 4.02E-02 |
| P55017 | 0.13 | 1.29E-02 |
| P41181 | 0.09 | 3.56E-02 |
| P10721 | 0.09 | 2.68E-02 |

| F5                 |             |          |
|--------------------|-------------|----------|
| Protein Accessions | Fold Change | P value  |
| P04279             | 17.62       | 2.84E-05 |
| Q02383             | 14.28       | 4.15E-06 |
| Q93091             | 12.23       | 1.23E-06 |
| P02750             | 9.46        | 1.60E-05 |
| O00754             | 8.94        | 2.99E-07 |
| Q13621             | 8.35        | 1.66E-06 |
| Q15293             | 6.34        | 6.93E-04 |
| Q86VP6             | 5.45        | 5.83E-05 |
| Q9H6S3             | 4.86        | 3.35E-04 |
| P50225             | 4.69        | 1.85E-03 |
| O00115             | 4.47        | 1.60E-05 |
| P22748             | 4.31        | 3.08E-05 |
| Q9BTY2             | 4.24        | 5.83E-05 |
| Q07075             | 4.12        | 1.29E-02 |
| P07339             | 4.09        | 1.19E-05 |
| P07858             | 4.07        | 8.40E-05 |
| P15848             | 4.04        | 1.81E-04 |
| Q13510             | 4.04        | 2.46E-05 |
| Q12929             | 4.00        | 2.98E-04 |
| Q99653             | 3.89        | 1.60E-05 |
| Q96RF0             | 3.80        | 9.51E-05 |
| P01911             | 3.77        | 6.22E-04 |
| Q6W4X9             | 3.75        | 1.25E-02 |
| P26038             | 3.74        | 1.26E-04 |
| Q9NUM4             | 3.70        | 1.30E-03 |
| P07686             | 3.69        | 8.40E-05 |
| Q9HD89             | 3.69        | 1.41E-04 |
| P02741             | 3.69        | 3.98E-05 |
| P02763             | 3.64        | 1.60E-03 |
| Q9UBR2             | 3.61        | 1.50E-06 |
| Q8N5I2             | 3.60        | 5.83E-05 |
| P17900             | 3.59        | 1.61E-02 |
| Q16819             | 3.58        | 2.02E-02 |
| P05937             | 3.56        | 4.72E-03 |
| P01903             | 3.56        | 3.53E-02 |
| P17050             | 3.56        | 8.08E-05 |
| O94832             | 3.51        | 1.26E-04 |

|        |      |          |
|--------|------|----------|
| Q13113 | 3.46 | 3.10E-04 |
| P04066 | 3.45 | 4.46E-05 |
| Q15274 | 3.35 | 6.87E-03 |
| Q9H223 | 3.32 | 7.06E-04 |
| Q9Y6X5 | 3.31 | 6.22E-04 |
| Q12765 | 3.28 | 5.87E-03 |
| Q9UHR4 | 3.27 | 1.43E-04 |
| P50570 | 3.20 | 1.89E-04 |
| P09668 | 3.19 | 3.10E-04 |
| P25774 | 3.19 | 6.22E-04 |
| Q9BYG5 | 3.16 | 1.51E-04 |
| Q7L5L3 | 3.15 | 5.17E-03 |
| O75629 | 3.15 | 6.70E-04 |
| P53634 | 3.15 | 5.83E-05 |
| Q9HBH0 | 3.12 | 2.95E-04 |
| P10619 | 3.04 | 4.00E-04 |
| Q969L2 | 3.01 | 3.35E-03 |
| P20472 | 3.00 | 1.92E-02 |
| Q9UQB8 | 2.99 | 2.81E-06 |
| P06865 | 2.95 | 8.08E-05 |
| Q8TE68 | 2.94 | 5.08E-04 |
| P09936 | 2.90 | 7.00E-03 |
| Q9UGM3 | 2.90 | 9.10E-03 |
| P15311 | 2.89 | 9.88E-04 |
| P50148 | 2.88 | 5.08E-04 |
| P17405 | 2.84 | 1.16E-04 |
| O96009 | 2.83 | 3.95E-03 |
| P54803 | 2.81 | 4.63E-04 |
| Q9Y646 | 2.80 | 1.37E-03 |
| O75348 | 2.79 | 6.93E-04 |
| P00492 | 2.79 | 3.34E-04 |
| A6NIZ1 | 2.76 | 5.20E-03 |
| P16278 | 2.76 | 1.53E-03 |
| Q8NCC3 | 2.75 | 1.74E-03 |
| P00746 | 2.75 | 1.08E-02 |
| O00338 | 2.74 | 1.14E-03 |
| P35241 | 2.71 | 9.51E-05 |
| P15313 | 2.71 | 1.43E-03 |
| Q6UWR7 | 2.70 | 2.08E-02 |



|        |      |          |
|--------|------|----------|
| P29992 | 2.68 | 4.50E-04 |
| P34059 | 2.66 | 3.83E-03 |
| Q9H3G5 | 2.65 | 2.49E-03 |
| P62195 | 2.65 | 2.78E-02 |
| Q9NZN3 | 2.62 | 7.92E-04 |
| P00568 | 2.61 | 3.35E-04 |
| P50897 | 2.58 | 5.83E-05 |
| Q9HBG4 | 2.58 | 3.69E-02 |
| P38606 | 2.57 | 2.95E-04 |
| P11279 | 2.55 | 8.21E-03 |
| P05413 | 2.54 | 3.22E-02 |
| Q5JS37 | 2.54 | 3.96E-03 |
| O00299 | 2.54 | 2.34E-04 |
| Q15833 | 2.52 | 1.70E-03 |
| Q96LD4 | 2.51 | 1.43E-04 |
| O75695 | 2.51 | 1.98E-03 |
| Q9NTK5 | 2.51 | 4.75E-03 |
| Q9HB40 | 2.49 | 7.62E-03 |
| Q9Y6E0 | 2.49 | 5.16E-03 |
| Q8NHP8 | 2.49 | 4.50E-04 |
| P21266 | 2.49 | 2.87E-03 |
| Q9UM54 | 2.45 | 1.74E-02 |
| P17858 | 2.45 | 1.88E-03 |
| Q9UI12 | 2.43 | 1.08E-03 |
| Q8N357 | 2.41 | 1.16E-02 |
| P36222 | 2.41 | 1.03E-02 |
| P84022 | 2.38 | 4.08E-02 |
| P54793 | 2.36 | 3.40E-02 |
| P00918 | 2.36 | 3.53E-02 |
| P60953 | 2.36 | 1.70E-02 |
| O00159 | 2.36 | 1.29E-02 |
| P02511 | 2.35 | 1.70E-02 |
| Q8NFJ5 | 2.35 | 2.58E-02 |
| Q9HAU8 | 2.33 | 1.43E-03 |
| P28161 | 2.33 | 5.47E-03 |
| P51688 | 2.32 | 3.40E-02 |
| P38646 | 2.32 | 4.93E-03 |
| P36871 | 2.30 | 1.94E-02 |
| Q16851 | 2.30 | 3.40E-03 |

|        |      |          |
|--------|------|----------|
| P98164 | 2.30 | 3.29E-04 |
| Q99519 | 2.30 | 9.51E-05 |
| P62834 | 2.26 | 1.06E-02 |
| Q8WWB7 | 2.26 | 3.44E-03 |
| P62330 | 2.26 | 1.23E-02 |
| P24593 | 2.25 | 1.08E-02 |
| Q9Y376 | 2.24 | 8.69E-03 |
| P15941 | 2.16 | 1.03E-02 |
| P35080 | 2.16 | 1.15E-02 |
| P08183 | 2.15 | 1.01E-02 |
| Q12923 | 2.15 | 2.76E-02 |
| P16152 | 2.13 | 7.62E-03 |
| Q13277 | 2.12 | 4.50E-04 |
| P41181 | 2.11 | 2.78E-02 |
| Q14764 | 2.11 | 1.02E-02 |
| Q9BQI0 | 2.10 | 3.66E-02 |
| P08754 | 2.10 | 1.18E-02 |
| P36543 | 2.08 | 1.43E-03 |
| P07602 | 2.08 | 7.62E-03 |
| Q9UHI7 | 2.08 | 1.45E-02 |
| P17174 | 2.07 | 8.94E-03 |
| P42685 | 2.07 | 2.01E-02 |
| P18669 | 2.07 | 1.84E-02 |
| Q8IV08 | 2.06 | 1.74E-02 |
| P15586 | 2.06 | 2.48E-03 |
| P30044 | 2.06 | 1.07E-02 |
| P40925 | 2.04 | 1.43E-03 |
| Q14344 | 2.02 | 8.02E-03 |
| Q9HBR0 | 0.49 | 3.22E-02 |
| P29323 | 0.49 | 1.40E-02 |
| P04180 | 0.47 | 4.06E-02 |
| P10586 | 0.47 | 6.03E-03 |
| P30530 | 0.46 | 3.83E-03 |
| P43121 | 0.45 | 1.03E-02 |
| Q13445 | 0.45 | 5.37E-03 |
| P09619 | 0.44 | 1.65E-02 |
| Q9BQ51 | 0.43 | 3.44E-03 |
| Q9UNN8 | 0.42 | 4.73E-03 |
| P13598 | 0.41 | 3.28E-02 |

|        |      |          |
|--------|------|----------|
| P21709 | 0.40 | 3.75E-02 |
| P28827 | 0.40 | 2.38E-02 |
| Q15223 | 0.39 | 1.18E-02 |
| Q06418 | 0.38 | 3.35E-02 |
| P19256 | 0.37 | 2.63E-02 |
| Q96JQ0 | 0.36 | 1.94E-02 |
| Q9NQS3 | 0.36 | 8.02E-03 |
| Q06481 | 0.36 | 1.03E-02 |
| P52798 | 0.35 | 3.19E-02 |
| P45877 | 0.35 | 4.06E-02 |
| Q13443 | 0.35 | 4.33E-02 |
| Q8TB96 | 0.35 | 1.18E-02 |
| P15151 | 0.34 | 3.35E-02 |
| Q99795 | 0.34 | 4.23E-02 |
| Q8N386 | 0.34 | 7.00E-03 |
| Q92859 | 0.32 | 7.38E-03 |
| Q02413 | 0.32 | 4.16E-02 |
| O75144 | 0.31 | 1.65E-02 |
| P48740 | 0.31 | 2.83E-02 |
| Q86T13 | 0.31 | 7.38E-03 |
| P0C7U0 | 0.30 | 3.78E-02 |
| Q9UBG0 | 0.30 | 5.08E-03 |
| Q9H1U4 | 0.30 | 3.63E-02 |
| Q6UXG3 | 0.29 | 2.58E-02 |
| P11047 | 0.27 | 7.38E-03 |
| Q9HCU0 | 0.26 | 1.43E-02 |
| O75339 | 0.24 | 2.58E-02 |
| O43921 | 0.23 | 1.92E-02 |
| Q9BWV1 | 0.21 | 1.37E-02 |
| Q8NDA2 | 0.16 | 3.12E-02 |

| F6                 |             |          |
|--------------------|-------------|----------|
| Protein Accessions | Fold Change | P value  |
| P05413             | 78.04       | 9.59E-07 |
| O15540             | 55.00       | 9.15E-07 |
| Q15293             | 49.47       | 2.28E-10 |
| P01911             | 31.69       | 9.43E-10 |
| P61769             | 27.63       | 1.37E-07 |
| P02750             | 26.43       | 4.68E-08 |
| P01903             | 19.95       | 1.32E-06 |
| Q9NWX4             | 18.19       | 3.68E-08 |
| Q9UBR2             | 16.90       | 1.96E-08 |
| P04179             | 16.32       | 1.55E-07 |
| P02763             | 15.75       | 3.41E-08 |
| P05534             | 15.53       | 6.70E-07 |
| Q8N357             | 13.89       | 1.96E-08 |
| P09668             | 13.45       | 1.25E-08 |
| P01700             | 12.73       | 4.25E-07 |
| Q9P1F3             | 12.31       | 1.78E-06 |
| P11684             | 11.77       | 9.23E-05 |
| O75368             | 11.74       | 2.67E-07 |
| Q92484             | 11.72       | 2.57E-06 |
| Q969H8             | 11.60       | 1.85E-06 |
| P01717             | 11.17       | 4.16E-08 |
| P01714             | 11.04       | 9.76E-05 |
| P02792             | 11.02       | 1.05E-06 |
| P0DOX3             | 10.80       | 1.59E-05 |
| A0A075B6K5         | 10.64       | 2.47E-06 |
| P00915             | 10.35       | 1.99E-05 |
| P02655             | 10.00       | 4.11E-05 |
| P00751             | 9.86        | 5.34E-04 |
| Q9UHI8             | 9.80        | 9.23E-05 |
| Q99988             | 9.68        | 2.01E-05 |
| P02776             | 9.59        | 2.11E-07 |
| Q93091             | 9.44        | 7.82E-07 |
| P30508             | 9.32        | 8.86E-07 |
| Q9Y6X5             | 9.01        | 2.11E-07 |
| Q07075             | 8.84        | 3.39E-05 |
| P02511             | 8.78        | 4.25E-07 |
| Q96H15             | 8.74        | 3.18E-07 |
| P00441             | 8.68        | 2.37E-07 |
| O43491             | 8.57        | 1.25E-06 |
| P0DOX8             | 8.55        | 2.11E-07 |
| P00742             | 8.49        | 1.23E-06 |
| Q9BZM5             | 8.23        | 1.38E-06 |
| P02753             | 8.10        | 5.66E-07 |
| O43556             | 8.04        | 1.32E-06 |
| O00244             | 7.99        | 4.36E-05 |
| P01011             | 7.99        | 4.85E-07 |

|            |      |          |
|------------|------|----------|
| P17405     | 7.92 | 3.68E-08 |
| P17900     | 7.72 | 3.55E-05 |
| P15814     | 7.71 | 3.81E-07 |
| Q92954     | 7.49 | 9.15E-05 |
| Q15274     | 7.47 | 7.07E-06 |
| P36980     | 7.41 | 7.11E-06 |
| P01721     | 7.36 | 8.18E-05 |
| P26641     | 7.36 | 6.60E-06 |
| P02656     | 7.33 | 1.00E-05 |
| A0A075B6I0 | 7.28 | 4.95E-06 |
| P27824     | 7.27 | 7.07E-06 |
| P27797     | 7.27 | 7.51E-05 |
| P06454     | 7.18 | 3.12E-04 |
| P52272     | 7.07 | 2.06E-03 |
| P78310     | 6.92 | 4.05E-06 |
| P19652     | 6.60 | 6.90E-06 |
| Q92530     | 6.56 | 5.20E-06 |
| P20774     | 6.50 | 3.17E-06 |
| Q8IX05     | 6.49 | 5.66E-07 |
| P18465     | 6.48 | 4.11E-05 |
| P07306     | 6.48 | 3.79E-05 |
| P13640     | 6.40 | 2.37E-04 |
| Q6UWR7     | 6.24 | 4.11E-05 |
| Q9UHY7     | 6.13 | 1.36E-06 |
| P04211     | 6.08 | 1.89E-06 |
| P25311     | 5.96 | 1.58E-04 |
| P01703     | 5.93 | 1.22E-05 |
| Q92887     | 5.88 | 2.41E-05 |
| P50225     | 5.87 | 1.22E-03 |
| P25774     | 5.87 | 1.58E-06 |
| P01009     | 5.84 | 4.25E-07 |
| P00995     | 5.81 | 3.48E-04 |
| P0DOY3     | 5.76 | 3.38E-04 |
| P84090     | 5.75 | 7.12E-04 |
| P01699     | 5.73 | 2.47E-06 |
| A0A0C4DH72 | 5.72 | 6.12E-04 |
| O00548     | 5.58 | 1.37E-02 |
| Q13740     | 5.52 | 4.25E-07 |
| P21583     | 5.49 | 1.59E-05 |
| Q8NFU3     | 5.47 | 1.79E-04 |
| Q9H8J5     | 5.45 | 1.17E-05 |
| Q6UWV6     | 5.43 | 3.58E-06 |
| Q9BW04     | 5.43 | 2.21E-04 |
| P0CF74     | 5.34 | 6.53E-03 |
| Q8NCW5     | 5.20 | 2.54E-04 |
| Q9BTY2     | 5.19 | 2.47E-06 |
| O00754     | 5.18 | 1.32E-06 |
| P07359     | 5.13 | 7.59E-06 |

|            |      |          |
|------------|------|----------|
| P29966     | 5.10 | 1.04E-04 |
| Q13228     | 5.07 | 1.62E-06 |
| Q13113     | 5.01 | 5.66E-06 |
| P07686     | 5.01 | 2.44E-06 |
| P27487     | 4.98 | 4.32E-06 |
| P15144     | 4.90 | 3.87E-04 |
| P02741     | 4.83 | 5.66E-07 |
| O60234     | 4.77 | 5.12E-05 |
| Q96IU4     | 4.76 | 8.36E-05 |
| O95861     | 4.72 | 2.06E-03 |
| Q9Y490     | 4.71 | 9.15E-05 |
| A0A075B6S5 | 4.69 | 9.52E-05 |
| Q9H299     | 4.66 | 5.04E-03 |
| Q8NCC3     | 4.64 | 1.10E-05 |
| Q9Y547     | 4.63 | 1.28E-05 |
| A0A075B6H9 | 4.62 | 9.83E-04 |
| P02794     | 4.56 | 4.48E-03 |
| P01599     | 4.56 | 7.83E-03 |
| P00740     | 4.55 | 9.83E-04 |
| P10109     | 4.54 | 7.36E-05 |
| Q9Y4L1     | 4.48 | 5.52E-04 |
| O00584     | 4.45 | 3.13E-05 |
| P12111     | 4.37 | 2.40E-04 |
| P35754     | 4.32 | 8.16E-04 |
| P53634     | 4.31 | 3.58E-06 |
| P0C0L4     | 4.30 | 3.78E-04 |
| P14207     | 4.26 | 9.30E-04 |
| P04066     | 4.26 | 2.06E-06 |
| P35080     | 4.25 | 1.48E-04 |
| Q02985     | 4.22 | 5.20E-06 |
| P00167     | 4.21 | 2.20E-03 |
| A0A0C4DH68 | 4.18 | 3.89E-05 |
| Q9Y5Y7     | 4.15 | 1.46E-04 |
| Q14019     | 4.15 | 1.21E-04 |
| Q9NUM4     | 4.12 | 2.37E-04 |
| A2NJV5     | 4.08 | 2.49E-04 |
| Q9HB90     | 4.05 | 3.20E-03 |
| P46108     | 4.05 | 2.01E-03 |
| P07737     | 4.04 | 1.85E-05 |
| Q9HC35     | 4.03 | 5.17E-05 |
| P01019     | 4.01 | 3.55E-05 |
| P01624     | 3.99 | 8.55E-04 |
| P12104     | 3.98 | 1.77E-03 |
| Q6ZVN8     | 3.98 | 1.86E-03 |
| P01601     | 3.92 | 4.23E-03 |
| Q92542     | 3.90 | 8.08E-04 |
| P06865     | 3.89 | 3.35E-06 |
| P19320     | 3.88 | 3.06E-03 |

|                            |      |          |
|----------------------------|------|----------|
| P04217                     | 3.86 | 1.78E-03 |
| P01619                     | 3.85 | 3.20E-03 |
| P08185                     | 3.83 | 4.71E-06 |
| O43399                     | 3.80 | 1.38E-03 |
| P00450                     | 3.80 | 1.90E-04 |
| Q96FW1                     | 3.72 | 5.15E-03 |
| P09923                     | 3.72 | 2.01E-02 |
| P23083                     | 3.71 | 2.61E-04 |
| P61916                     | 3.68 | 4.65E-07 |
| Q6FHJ7                     | 3.67 | 5.57E-03 |
| P01860                     | 3.61 | 1.06E-02 |
| Q03591                     | 3.55 | 1.01E-02 |
| O43570                     | 3.55 | 4.13E-05 |
| P80723                     | 3.53 | 3.43E-02 |
| Q8WU39                     | 3.52 | 3.84E-04 |
| Q8IW52                     | 3.47 | 2.32E-03 |
| P83110                     | 3.46 | 6.52E-04 |
| P54289                     | 3.40 | 1.10E-03 |
| Q9Y274                     | 3.40 | 2.84E-03 |
| P01715                     | 3.38 | 3.55E-05 |
| O75608                     | 3.35 | 1.39E-05 |
| Q99972                     | 3.33 | 7.39E-04 |
| P01344                     | 3.28 | 1.08E-04 |
| P28838                     | 3.28 | 3.87E-04 |
| Q15121                     | 3.28 | 1.82E-03 |
| Q9Y5Z4                     | 3.27 | 9.34E-04 |
| P35613                     | 3.20 | 8.11E-04 |
| Q03167                     | 3.17 | 8.55E-04 |
| Q5JTV8                     | 3.17 | 2.57E-03 |
| P30048                     | 3.16 | 2.08E-02 |
| P13667                     | 3.16 | 9.11E-05 |
| O15204                     | 3.15 | 5.45E-03 |
| Q9Y275                     | 3.13 | 8.96E-03 |
| P60983                     | 3.12 | 6.98E-03 |
| Q8NBS9                     | 3.12 | 1.87E-04 |
| P22223                     | 3.11 | 8.11E-04 |
| P67809                     | 3.10 | 2.09E-03 |
| P37840                     | 3.08 | 9.41E-03 |
| P62328                     | 3.08 | 1.04E-02 |
| A0A075B6K4                 | 3.06 | 7.83E-03 |
| P50440                     | 3.05 | 3.32E-02 |
| O76076                     | 3.05 | 1.54E-02 |
| Q9BYE9                     | 3.04 | 3.50E-04 |
| Q86YD5                     | 3.04 | 1.01E-02 |
| P50053                     | 3.03 | 5.91E-04 |
| Q12765                     | 3.03 | 4.88E-03 |
| P55103                     | 3.03 | 4.88E-03 |
| ENSEMBL:ENSBTAP00000007350 | 3.00 | 3.09E-03 |

|            |      |          |
|------------|------|----------|
| P20142     | 3.00 | 4.96E-02 |
| Q9NY33     | 3.00 | 2.19E-02 |
| O75531     | 2.98 | 1.98E-03 |
| Q8NFQ8     | 2.93 | 7.58E-03 |
| Q9H0U4     | 2.93 | 3.73E-02 |
| Q9H6X2     | 2.91 | 5.57E-03 |
| P02671     | 2.89 | 2.87E-03 |
| P0DOX7     | 2.89 | 2.32E-03 |
| P10619     | 2.89 | 2.17E-04 |
| Q13421     | 2.88 | 2.48E-02 |
| P18428     | 2.85 | 3.19E-04 |
| P02790     | 2.85 | 9.96E-05 |
| P30101     | 2.84 | 5.45E-03 |
| P08571     | 2.84 | 3.94E-03 |
| Q8N2U0     | 2.81 | 1.06E-02 |
| P04233     | 2.77 | 1.09E-02 |
| Q8N126     | 2.75 | 3.34E-03 |
| P15586     | 2.72 | 4.11E-05 |
| Q00839     | 2.72 | 3.70E-03 |
| Q9NVJ2     | 2.72 | 1.33E-02 |
| P07858     | 2.71 | 7.91E-04 |
| Q9UGM5     | 2.70 | 5.45E-03 |
| P11279     | 2.69 | 2.40E-03 |
| Q92520     | 2.68 | 8.08E-05 |
| Q13510     | 2.66 | 1.33E-04 |
| A0A087WSX0 | 2.66 | 2.68E-02 |
| A0A0B4J1V6 | 2.65 | 1.91E-03 |
| P19438     | 2.65 | 3.81E-04 |
| P06312     | 2.63 | 8.47E-03 |
| A0A0A0MS15 | 2.63 | 3.20E-03 |
| P04216     | 2.62 | 1.87E-05 |
| Q24JP5     | 2.61 | 4.66E-02 |
| P12318     | 2.60 | 2.87E-02 |
| P06681     | 2.56 | 3.45E-02 |
| A0A075B6Q5 | 2.56 | 2.94E-02 |
| Q8NHJ6     | 2.54 | 3.78E-03 |
| Q9UHI7     | 2.53 | 9.42E-03 |
| P07225     | 2.53 | 1.20E-03 |
| Q03405     | 2.51 | 8.85E-03 |
| P16422     | 2.50 | 1.17E-02 |
| P01593     | 2.49 | 1.07E-02 |
| Q96FN5     | 2.49 | 3.82E-02 |
| Q7L5L3     | 2.49 | 1.37E-02 |
| P0CG47     | 2.48 | 5.54E-03 |
| Q9HD89     | 2.47 | 6.55E-03 |
| P39687     | 2.46 | 3.56E-02 |
| Q92820     | 2.46 | 7.39E-04 |
| P05362     | 2.46 | 2.90E-02 |



|                   |      |          |
|-------------------|------|----------|
| P07339            | 2.45 | 2.37E-04 |
| P00746            | 2.45 | 1.04E-02 |
| SWISS-PROT:P00978 | 2.44 | 1.43E-02 |
| Q02487            | 2.43 | 6.41E-03 |
| Q6UXB8            | 2.42 | 2.32E-02 |
| P07602            | 2.42 | 8.55E-04 |
| Q96GW7            | 2.40 | 2.98E-02 |
| Q16563            | 2.39 | 1.58E-02 |
| Q92626            | 2.39 | 1.88E-03 |
| P02452            | 2.39 | 3.88E-02 |
| Q8WWB7            | 2.39 | 1.09E-02 |
| Q92692            | 2.38 | 4.38E-03 |
| Q9BVM4            | 2.38 | 6.85E-03 |
| Q14112            | 2.38 | 6.99E-03 |
| P17858            | 2.37 | 1.94E-03 |
| O95336            | 2.35 | 3.69E-03 |
| Q14108            | 2.35 | 1.13E-02 |
| P48551            | 2.34 | 3.59E-02 |
| O75936            | 2.34 | 1.66E-03 |
| Q6ZQN7            | 2.33 | 4.29E-02 |
| P29279            | 2.31 | 4.74E-03 |
| P05091            | 2.30 | 2.19E-02 |
| P02760            | 2.30 | 1.72E-02 |
| A0A0J9YXX1        | 2.29 | 1.01E-02 |
| P0COL5            | 2.29 | 4.89E-03 |
| O75503            | 2.26 | 6.22E-04 |
| P61026            | 2.25 | 3.52E-02 |
| P02787            | 2.24 | 2.83E-02 |
| Q9HAT2            | 2.24 | 2.24E-03 |
| Q9BPX5            | 2.24 | 1.90E-02 |
| Q9Y646            | 2.23 | 4.34E-03 |
| P55285            | 2.23 | 1.04E-02 |
| P36941            | 2.22 | 6.85E-03 |
| P00747            | 2.22 | 1.71E-02 |
| P23470            | 2.21 | 5.56E-04 |
| Q9BTM9            | 2.20 | 1.01E-02 |
| P07711            | 2.18 | 1.07E-03 |
| P17936            | 2.16 | 2.13E-02 |
| Q96HD9            | 2.15 | 3.24E-02 |
| Q92496            | 2.15 | 3.88E-02 |
| Q9H6B4            | 2.14 | 1.67E-02 |
| Q96CX2            | 2.13 | 1.33E-02 |
| P11597            | 2.13 | 1.06E-02 |
| P05981            | 2.13 | 3.78E-04 |
| P01008            | 2.12 | 2.40E-03 |
| Q99571            | 2.11 | 1.04E-02 |
| Q8TDQ1            | 2.10 | 1.01E-02 |
| Q14624            | 2.10 | 2.89E-02 |

|        |      |          |
|--------|------|----------|
| P09382 | 2.10 | 2.78E-02 |
| P98172 | 2.10 | 8.64E-03 |
| Q92485 | 2.09 | 3.24E-02 |
| Q14165 | 2.07 | 1.15E-02 |
| P01859 | 2.07 | 3.62E-02 |
| Q15043 | 2.06 | 1.10E-02 |
| Q16851 | 2.06 | 4.38E-03 |
| P28300 | 2.04 | 3.29E-02 |
| Q9UM22 | 2.02 | 6.86E-03 |
| P01871 | 2.02 | 2.69E-02 |
| Q92734 | 2.01 | 3.62E-02 |
| P09327 | 2.00 | 3.24E-02 |
| Q8NC42 | 0.49 | 4.96E-02 |
| P55899 | 0.48 | 3.04E-02 |
| O60361 | 0.48 | 4.36E-02 |
| O43278 | 0.47 | 2.86E-02 |
| Q9HBR0 | 0.47 | 1.46E-02 |
| Q01973 | 0.46 | 3.81E-02 |
| O60888 | 0.46 | 8.47E-03 |
| Q86T13 | 0.45 | 1.15E-02 |
| P16234 | 0.45 | 4.65E-02 |
| Q9Y287 | 0.45 | 3.26E-02 |
| P10586 | 0.45 | 2.32E-03 |
| Q8N386 | 0.43 | 7.83E-03 |
| Q9UBG0 | 0.42 | 7.19E-03 |
| P43121 | 0.41 | 4.00E-03 |
| P05026 | 0.41 | 2.32E-02 |
| Q9UNN8 | 0.40 | 2.06E-03 |
| Q9NPF0 | 0.40 | 3.62E-02 |
| Q9Y4D7 | 0.40 | 2.32E-02 |
| P29323 | 0.40 | 2.09E-03 |
| P02774 | 0.40 | 3.64E-02 |
| Q9BQ51 | 0.40 | 1.23E-03 |
| O00391 | 0.39 | 1.10E-02 |
| P63241 | 0.39 | 4.69E-02 |
| P40189 | 0.39 | 2.26E-02 |
| Q9Y653 | 0.39 | 4.92E-02 |
| O60449 | 0.39 | 4.63E-02 |
| P30530 | 0.38 | 1.65E-03 |
| Q08722 | 0.38 | 1.04E-02 |
| P58499 | 0.38 | 3.50E-02 |
| P13598 | 0.38 | 1.37E-02 |
| P06280 | 0.38 | 3.26E-02 |
| P15151 | 0.38 | 2.32E-02 |
| Q6P9A2 | 0.37 | 3.82E-02 |
| Q9NQS3 | 0.37 | 4.61E-03 |
| Q9Y5K6 | 0.37 | 3.63E-02 |
| Q6P531 | 0.36 | 2.32E-02 |

|        |      |          |
|--------|------|----------|
| Q9P0T7 | 0.36 | 4.98E-02 |
| P30086 | 0.36 | 1.37E-02 |
| Q04760 | 0.35 | 1.80E-02 |
| Q08334 | 0.34 | 2.65E-02 |
| P63092 | 0.33 | 2.70E-02 |
| P82980 | 0.33 | 3.36E-02 |
| Q9HBB8 | 0.33 | 4.62E-02 |
| Q06418 | 0.33 | 1.23E-02 |
| Q06481 | 0.33 | 4.59E-03 |
| P12259 | 0.33 | 1.75E-02 |
| P15291 | 0.32 | 1.33E-02 |
| Q6UX71 | 0.32 | 2.56E-03 |
| Q15223 | 0.32 | 3.70E-03 |
| P17931 | 0.32 | 4.25E-02 |
| Q6EMK4 | 0.31 | 3.20E-02 |
| Q9NY97 | 0.31 | 4.26E-02 |
| Q12860 | 0.31 | 4.61E-02 |
| P16070 | 0.31 | 1.34E-02 |
| Q7Z7M0 | 0.31 | 2.26E-02 |
| Q86YT9 | 0.30 | 1.71E-02 |
| Q8WUM4 | 0.30 | 1.06E-02 |
| Q9HCU0 | 0.30 | 1.03E-02 |
| P0DMQ5 | 0.30 | 1.71E-02 |
| Q02413 | 0.30 | 2.13E-02 |
| O43895 | 0.29 | 3.31E-02 |
| Q99816 | 0.29 | 2.63E-02 |
| P15313 | 0.29 | 4.55E-02 |
| Q8N5I2 | 0.29 | 2.32E-02 |
| Q8NBJ4 | 0.29 | 4.05E-02 |
| P14784 | 0.29 | 2.12E-02 |
| Q9Y639 | 0.29 | 3.07E-02 |
| Q9H9H4 | 0.28 | 3.43E-02 |
| Q6UXG3 | 0.28 | 1.34E-02 |
| Q8TB96 | 0.28 | 4.15E-03 |
| Q9H4M9 | 0.28 | 3.41E-03 |
| Q9UQB8 | 0.28 | 2.40E-04 |
| Q7KYR7 | 0.28 | 4.74E-03 |
| Q9HCM3 | 0.28 | 8.47E-03 |
| P32942 | 0.27 | 3.15E-02 |
| P09486 | 0.27 | 1.34E-02 |
| Q16651 | 0.27 | 3.24E-02 |
| P21266 | 0.27 | 3.88E-02 |
| P09619 | 0.27 | 2.55E-03 |
| Q9BY67 | 0.27 | 3.99E-02 |
| P61106 | 0.27 | 2.86E-02 |
| O75351 | 0.27 | 2.13E-02 |
| Q13443 | 0.26 | 1.44E-02 |
| P20827 | 0.26 | 5.91E-03 |

|        |      |          |
|--------|------|----------|
| P05452 | 0.26 | 3.81E-02 |
| Q05707 | 0.26 | 1.04E-02 |
| Q99835 | 0.26 | 2.06E-03 |
| Q96PD5 | 0.25 | 3.15E-02 |
| Q9H741 | 0.25 | 1.24E-02 |
| Q8IWA5 | 0.25 | 1.86E-02 |
| Q92673 | 0.24 | 1.01E-02 |
| O75144 | 0.24 | 4.52E-03 |
| Q01151 | 0.24 | 1.62E-02 |
| Q96FE7 | 0.24 | 2.66E-02 |
| Q8TBP5 | 0.24 | 1.52E-02 |
| Q9UJJ9 | 0.24 | 9.42E-03 |
| Q9Y376 | 0.24 | 3.29E-02 |
| Q04721 | 0.23 | 2.11E-02 |
| Q9H9P2 | 0.23 | 4.69E-02 |
| P19256 | 0.23 | 5.71E-03 |
| Q12913 | 0.23 | 1.76E-02 |
| Q96CF2 | 0.23 | 3.82E-02 |
| O75882 | 0.22 | 4.15E-03 |
| Q9NP85 | 0.22 | 1.39E-02 |
| Q15116 | 0.22 | 7.52E-03 |
| P01042 | 0.22 | 3.45E-02 |
| P04180 | 0.22 | 3.76E-03 |
| Q5SZK8 | 0.21 | 4.59E-03 |
| Q96NY8 | 0.21 | 1.78E-02 |
| Q13591 | 0.20 | 2.91E-02 |
| P35858 | 0.20 | 4.26E-02 |
| P16035 | 0.20 | 1.16E-02 |
| P26992 | 0.19 | 1.30E-02 |
| Q6UY11 | 0.19 | 3.74E-02 |
| Q9UK41 | 0.19 | 8.00E-03 |
| Q92859 | 0.19 | 1.46E-03 |
| P15941 | 0.19 | 2.69E-02 |
| P24855 | 0.19 | 5.45E-03 |
| Q15262 | 0.18 | 5.15E-03 |
| P11047 | 0.18 | 2.09E-03 |
| P23284 | 0.18 | 9.29E-03 |
| Q9UGT4 | 0.18 | 2.51E-02 |
| Q96JQ0 | 0.18 | 3.09E-03 |
| P27930 | 0.17 | 3.31E-02 |
| P45877 | 0.17 | 8.21E-03 |
| Q9NZZ3 | 0.17 | 4.68E-02 |
| P50148 | 0.17 | 1.62E-02 |
| Q86XT2 | 0.16 | 3.50E-02 |
| Q9UKU6 | 0.16 | 5.16E-03 |
| Q9ULK6 | 0.16 | 1.11E-02 |
| Q8IUL8 | 0.16 | 8.65E-03 |
| Q9UN37 | 0.16 | 6.55E-03 |

|        |      |          |
|--------|------|----------|
| Q9NU53 | 0.15 | 2.55E-03 |
| Q5IJ48 | 0.15 | 3.26E-02 |
| Q9H0X4 | 0.15 | 5.39E-03 |
| P08582 | 0.14 | 3.45E-02 |
| O75339 | 0.14 | 7.83E-03 |
| Q9UQN3 | 0.14 | 4.87E-02 |
| Q96EY5 | 0.14 | 5.60E-03 |
| P80370 | 0.13 | 2.26E-02 |
| P41217 | 0.13 | 6.41E-03 |
| Q9NP79 | 0.13 | 1.42E-02 |
| Q9H1U4 | 0.13 | 7.83E-03 |
| P41181 | 0.13 | 3.92E-02 |
| P32004 | 0.12 | 4.36E-02 |
| Q9UBQ6 | 0.11 | 1.21E-02 |
| Q7LBR1 | 0.11 | 8.26E-03 |
| Q5VW32 | 0.11 | 3.82E-02 |
| P21926 | 0.11 | 3.36E-02 |
| Q12864 | 0.10 | 4.59E-03 |
| P0C7U0 | 0.10 | 6.86E-03 |
| Q9P121 | 0.10 | 3.88E-02 |
| Q8NDA2 | 0.09 | 1.18E-02 |
| P55017 | 0.09 | 1.01E-02 |
| Q8IX04 | 0.08 | 4.65E-02 |
| Q9Y6W3 | 0.07 | 2.69E-02 |
| P12273 | 0.07 | 1.61E-02 |
| Q6V0I7 | 0.07 | 1.23E-02 |

| F7                 |             |          |
|--------------------|-------------|----------|
| Protein Accessions | Fold Change | P value  |
| Q8WWA0             | 17.17       | 4.18E-07 |
| Q07837             | 13.00       | 9.22E-08 |
| Q8N2U0             | 12.29       | 4.18E-07 |
| Q99102             | 11.38       | 1.41E-05 |
| Q00325             | 10.97       | 2.44E-06 |
| P21796             | 10.77       | 4.17E-07 |
| P45880             | 10.20       | 4.60E-06 |
| Q9UGM3             | 9.47        | 5.11E-07 |
| Q7L5L3             | 9.27        | 1.95E-06 |
| Q8N357             | 8.60        | 8.02E-07 |
| P02792             | 7.93        | 3.42E-05 |
| Q9H3K2             | 6.89        | 2.76E-05 |
| P49788             | 6.63        | 2.92E-04 |
| Q13113             | 6.62        | 4.60E-06 |
| P02741             | 6.31        | 4.17E-07 |
| P27105             | 5.90        | 1.60E-05 |
| P01903             | 5.87        | 1.41E-03 |
| Q92542             | 5.66        | 1.05E-04 |
| Q14116             | 5.52        | 4.29E-04 |
| Q6UX06             | 5.45        | 1.17E-03 |
| Q695T7             | 5.33        | 1.05E-04 |
| P11279             | 5.20        | 3.15E-05 |
| P09923             | 5.18        | 4.50E-03 |
| Q9HD89             | 5.04        | 2.13E-05 |
| O96009             | 4.95        | 4.38E-05 |
| P10109             | 4.85        | 1.72E-04 |
| Q8N307             | 4.76        | 1.05E-04 |
| Q1EHB4             | 4.74        | 1.05E-04 |
| Q9NVJ2             | 4.71        | 3.85E-04 |
| Q9UHG3             | 4.58        | 1.69E-04 |
| Q9Y6R7             | 4.52        | 2.89E-02 |
| O43866             | 4.49        | 1.41E-05 |
| P54793             | 4.40        | 3.02E-04 |
| Q16563             | 4.35        | 2.27E-04 |
| O00182             | 4.35        | 1.60E-05 |
| Q9UHI7             | 4.27        | 3.15E-05 |
| P02511             | 4.24        | 3.90E-04 |

|            |      |          |
|------------|------|----------|
| Q06495     | 4.07 | 5.10E-03 |
| Q96A25     | 4.06 | 3.92E-04 |
| Q9NS93     | 4.03 | 1.88E-03 |
| A0A075B6K5 | 4.00 | 6.06E-03 |
| Q9NZT2     | 3.92 | 3.75E-03 |
| Q6UWR7     | 3.91 | 1.45E-03 |
| P36639     | 3.90 | 1.79E-04 |
| Q9NY25     | 3.89 | 3.42E-05 |
| Q9C0H2     | 3.88 | 9.09E-04 |
| Q93091     | 3.87 | 2.42E-03 |
| Q9NRX4     | 3.85 | 3.65E-02 |
| Q9BXN2     | 3.72 | 2.84E-05 |
| Q9Y696     | 3.72 | 2.63E-03 |
| P08473     | 3.68 | 1.47E-03 |
| Q9BRT3     | 3.64 | 1.47E-03 |
| A0A075B6K4 | 3.63 | 4.69E-03 |
| Q9Y512     | 3.59 | 5.09E-05 |
| Q07075     | 3.48 | 3.99E-02 |
| A0PJK1     | 3.46 | 5.87E-04 |
| Q9HB90     | 3.44 | 1.69E-02 |
| P02654     | 3.42 | 9.09E-04 |
| P61970     | 3.39 | 2.51E-04 |
| A0A0J9YXX1 | 3.34 | 5.46E-04 |
| Q14108     | 3.32 | 1.27E-03 |
| P23297     | 3.30 | 1.15E-02 |
| Q7Z3F1     | 3.28 | 5.45E-03 |
| P18428     | 3.28 | 1.88E-04 |
| Q13183     | 3.25 | 1.51E-04 |
| O43451     | 3.23 | 2.25E-03 |
| Q9H665     | 3.17 | 3.02E-04 |
| Q495M3     | 3.16 | 1.04E-03 |
| A6NI73     | 3.11 | 5.09E-04 |
| O95336     | 3.09 | 5.46E-04 |
| Q99571     | 3.00 | 8.96E-04 |
| P07320     | 2.95 | 7.62E-03 |
| Q8WWB7     | 2.93 | 3.26E-04 |
| Q9BVM4     | 2.90 | 2.00E-03 |
| P28908     | 2.89 | 6.96E-05 |
| Q9BUH6     | 2.89 | 3.23E-03 |

|        |      |          |
|--------|------|----------|
| Q08380 | 2.85 | 2.91E-04 |
| P01877 | 2.84 | 1.88E-03 |
| P01876 | 2.83 | 9.18E-03 |
| Q5T2W1 | 2.82 | 4.17E-04 |
| P09668 | 2.79 | 7.31E-04 |
| P15144 | 2.75 | 4.67E-02 |
| P23083 | 2.71 | 3.53E-03 |
| P55899 | 2.70 | 1.15E-04 |
| P13688 | 2.69 | 3.82E-04 |
| P13611 | 2.69 | 4.82E-04 |
| O94832 | 2.69 | 1.86E-03 |
| P05981 | 2.65 | 9.62E-05 |
| Q14764 | 2.64 | 1.26E-03 |
| Q96LD4 | 2.62 | 4.38E-05 |
| P11117 | 2.62 | 4.02E-03 |
| P98164 | 2.59 | 7.70E-05 |
| O60271 | 2.57 | 1.09E-02 |
| Q9H756 | 2.56 | 1.05E-04 |
| P25774 | 2.54 | 3.58E-03 |
| P16278 | 2.54 | 2.90E-03 |
| P60953 | 2.53 | 8.49E-03 |
| Q6ZQN7 | 2.52 | 2.03E-03 |
| O14745 | 2.52 | 8.96E-04 |
| Q9Y2E5 | 2.49 | 4.17E-02 |
| P01589 | 2.48 | 6.05E-03 |
| Q8IV08 | 2.48 | 2.97E-03 |
| O00754 | 2.47 | 1.07E-03 |
| P01699 | 2.46 | 2.20E-03 |
| P01591 | 2.45 | 9.10E-03 |
| Q9BZZ2 | 2.44 | 1.41E-03 |
| Q496F6 | 2.44 | 4.74E-03 |
| P20062 | 2.43 | 2.34E-03 |
| P01717 | 2.42 | 1.51E-03 |
| P30508 | 2.42 | 3.16E-02 |
| Q96FL8 | 2.40 | 4.22E-02 |
| P61026 | 2.40 | 6.75E-05 |
| P10619 | 2.38 | 2.45E-03 |
| P56537 | 2.38 | 2.92E-04 |
| Q13510 | 2.38 | 8.44E-04 |



|                   |      |          |
|-------------------|------|----------|
| P01700            | 2.37 | 3.35E-04 |
| P29972            | 2.36 | 2.08E-02 |
| Q9Y6R1            | 2.35 | 4.73E-02 |
| Q9BXJ7            | 2.35 | 9.69E-03 |
| P05091            | 2.35 | 3.83E-02 |
| O15118            | 2.33 | 7.31E-04 |
| Q15116            | 2.33 | 8.44E-04 |
| Q8NHJ6            | 2.33 | 7.55E-03 |
| P16444            | 2.30 | 2.45E-02 |
| Q6UWV6            | 2.28 | 7.56E-03 |
| P01833            | 2.28 | 1.04E-03 |
| Q9NUM4            | 2.28 | 4.95E-02 |
| P02655            | 2.26 | 4.10E-02 |
| Q16581            | 2.25 | 8.17E-04 |
| Q93050            | 2.25 | 3.23E-03 |
| P51149            | 2.21 | 7.62E-03 |
| Q8NHP8            | 2.20 | 7.05E-04 |
| Q8WWV6            | 2.18 | 3.02E-02 |
| P34059            | 2.17 | 2.08E-02 |
| P01701            | 2.16 | 3.77E-02 |
| Q9Y6X5            | 2.16 | 2.17E-02 |
| Q92626            | 2.14 | 4.70E-03 |
| Q9H4M9            | 2.13 | 4.93E-04 |
| O75531            | 2.12 | 3.12E-02 |
| Q5JS37            | 2.12 | 2.03E-02 |
| Q9H223            | 2.09 | 3.43E-02 |
| O75955            | 2.09 | 9.66E-03 |
| SWISS-PROT:Q03247 | 2.08 | 1.31E-02 |
| O75936            | 2.08 | 8.81E-03 |
| P50570            | 2.08 | 7.62E-03 |
| Q8WWI5            | 2.05 | 3.23E-03 |
| Q9UQB8            | 2.05 | 9.62E-05 |
| P02748            | 2.04 | 5.53E-03 |
| Q8N386            | 2.04 | 8.58E-04 |
| P68371            | 2.02 | 3.65E-02 |
| P07602            | 2.01 | 9.80E-03 |
| Q9HBH0            | 2.01 | 1.56E-02 |
| P26038            | 2.00 | 1.73E-02 |
| Q92859            | 0.50 | 3.09E-02 |

|        |      |          |
|--------|------|----------|
| P11047 | 0.50 | 4.10E-02 |
| Q07507 | 0.47 | 1.92E-02 |
| P07942 | 0.47 | 2.45E-02 |
| Q9UBG0 | 0.45 | 1.69E-02 |
| P13598 | 0.41 | 3.50E-02 |
| P04216 | 0.40 | 6.05E-03 |
| P09619 | 0.38 | 1.10E-02 |
| Q06418 | 0.38 | 3.50E-02 |
| P04180 | 0.32 | 1.39E-02 |
| O43556 | 0.29 | 2.27E-02 |
| P43652 | 0.28 | 4.17E-02 |
| P26992 | 0.26 | 3.76E-02 |
| P43121 | 0.22 | 1.47E-03 |
| O75339 | 0.20 | 2.06E-02 |
| Q96PD5 | 0.13 | 3.18E-02 |
| Q9Y6N8 | 0.12 | 1.73E-02 |

| F8                 |             |          |
|--------------------|-------------|----------|
| Protein Accessions | Fold Change | P value  |
| P06454             | 431.16      | 8.95E-13 |
| O75368             | 170.21      | 4.72E-11 |
| P62328             | 161.55      | 1.97E-06 |
| O60234             | 123.71      | 1.06E-14 |
| P07737             | 121.54      | 6.77E-07 |
| P00915             | 118.58      | 6.20E-10 |
| Q9P1F3             | 113.57      | 8.95E-13 |
| P52272             | 96.31       | 1.18E-06 |
| Q9Y547             | 81.74       | 2.83E-07 |
| P35754             | 58.11       | 8.60E-12 |
| O00244             | 57.79       | 1.80E-09 |
| Q96H15             | 50.15       | 1.48E-09 |
| O95861             | 49.71       | 1.01E-10 |
| Q14019             | 46.04       | 6.20E-10 |
| Q9UHY7             | 44.40       | 2.40E-08 |
| O75608             | 41.10       | 2.23E-08 |
| Q9NWW4             | 38.72       | 6.09E-11 |
| P39687             | 35.01       | 1.27E-09 |
| P07360             | 33.60       | 1.01E-10 |
| P84090             | 31.14       | 6.20E-10 |
| Q9H3K6             | 31.04       | 3.19E-08 |
| Q8IX05             | 27.35       | 4.06E-08 |
| P61769             | 25.81       | 3.22E-08 |
| P30050             | 24.65       | 1.22E-08 |
| Q9Y279             | 23.24       | 6.45E-08 |
| P26368             | 22.34       | 1.80E-09 |
| P36639             | 21.85       | 5.22E-09 |
| Q9NZT2             | 21.04       | 6.09E-09 |
| P08833             | 20.85       | 1.10E-06 |
| Q93091             | 19.91       | 9.56E-08 |
| P01589             | 19.60       | 1.55E-07 |
| P13640             | 18.89       | 5.14E-08 |
| P02763             | 18.63       | 2.59E-09 |
| Q9Y5Y7             | 18.62       | 4.69E-09 |
| Q9Y6X5             | 18.41       | 8.85E-08 |
| P62993             | 17.91       | 5.24E-10 |
| O43396             | 17.89       | 4.19E-09 |
| Q8IWT0             | 17.89       | 1.06E-06 |
| Q9ULZ3             | 17.74       | 1.16E-06 |
| P29966             | 17.62       | 8.72E-07 |
| P01717             | 17.18       | 4.39E-08 |
| P60983             | 16.81       | 4.17E-09 |
| O75531             | 16.78       | 1.06E-06 |
| Q9Y4L1             | 16.52       | 4.73E-08 |
| P05534             | 16.49       | 4.04E-09 |
| Q9Y490             | 16.43       | 1.87E-07 |

|        |       |          |
|--------|-------|----------|
| Q969H8 | 15.14 | 5.73E-07 |
| Q9H299 | 15.11 | 1.97E-06 |
| O95450 | 14.93 | 3.32E-07 |
| Q86WQ0 | 14.87 | 1.80E-08 |
| P12104 | 14.86 | 5.26E-08 |
| P0CG47 | 14.70 | 1.35E-08 |
| Q92530 | 14.69 | 4.69E-09 |
| Q9BTM9 | 14.47 | 1.38E-06 |
| Q13113 | 14.09 | 1.97E-09 |
| Q8WU39 | 13.93 | 1.13E-08 |
| Q02790 | 13.78 | 4.30E-09 |
| P28070 | 13.74 | 2.55E-09 |
| P30508 | 13.71 | 1.35E-08 |
| Q16661 | 13.69 | 2.17E-05 |
| Q15293 | 13.60 | 1.30E-07 |
| O43491 | 13.55 | 6.12E-07 |
| P67809 | 13.55 | 4.27E-07 |
| P00441 | 13.22 | 4.19E-09 |
| Q9NRX4 | 13.15 | 1.07E-07 |
| P00995 | 13.10 | 4.88E-07 |
| Q9BZM5 | 13.06 | 2.09E-06 |
| P18465 | 12.95 | 5.39E-08 |
| Q8TDQ1 | 12.66 | 5.37E-08 |
| Q6UWV6 | 12.20 | 2.88E-04 |
| Q16186 | 12.09 | 1.62E-07 |
| P02776 | 11.83 | 1.18E-06 |
| P26641 | 11.80 | 4.46E-07 |
| Q9H8J5 | 11.62 | 4.69E-09 |
| P02753 | 11.55 | 2.13E-07 |
| Q92954 | 11.55 | 1.48E-06 |
| Q9UBR2 | 11.37 | 4.23E-11 |
| Q15121 | 11.23 | 1.62E-07 |
| P56537 | 11.21 | 3.03E-11 |
| P80723 | 10.89 | 7.84E-06 |
| Q9BRT3 | 10.79 | 9.87E-08 |
| Q92743 | 10.52 | 9.01E-06 |
| P20333 | 10.50 | 6.39E-07 |
| Q496F6 | 10.47 | 4.38E-07 |
| Q8NHJ6 | 10.44 | 1.22E-08 |
| P07910 | 10.41 | 4.12E-07 |
| P55884 | 10.40 | 9.86E-04 |
| P01704 | 10.34 | 3.74E-04 |
| P02461 | 10.32 | 7.71E-06 |
| Q6UWR7 | 10.25 | 3.30E-07 |
| Q8TCD5 | 10.21 | 1.67E-08 |
| Q14515 | 10.03 | 1.37E-06 |
| P14207 | 10.01 | 8.85E-08 |
| P36269 | 9.96  | 1.87E-06 |

|            |      |          |
|------------|------|----------|
| P83110     | 9.92 | 1.86E-07 |
| Q13421     | 9.91 | 1.48E-06 |
| P13796     | 9.77 | 4.46E-07 |
| P15814     | 9.75 | 3.58E-04 |
| P0DOX3     | 9.69 | 1.45E-05 |
| P0DOX8     | 9.69 | 4.06E-08 |
| O43556     | 9.66 | 1.48E-09 |
| P02792     | 9.61 | 7.86E-07 |
| Q8NCW5     | 9.52 | 1.08E-05 |
| Q9BVM4     | 9.44 | 4.01E-05 |
| Q92484     | 9.27 | 4.27E-06 |
| P63208     | 9.21 | 5.46E-03 |
| Q9NY33     | 9.19 | 3.06E-06 |
| P04118     | 9.10 | 3.74E-04 |
| P07108     | 8.96 | 1.34E-06 |
| Q1EHB4     | 8.83 | 1.45E-04 |
| O95336     | 8.67 | 1.59E-07 |
| Q96GD0     | 8.66 | 1.87E-07 |
| P02750     | 8.48 | 3.63E-07 |
| P0CF74     | 8.45 | 1.82E-05 |
| P36980     | 8.45 | 9.23E-07 |
| P01700     | 8.34 | 1.79E-04 |
| Q9H3Z4     | 8.31 | 2.67E-09 |
| P62253     | 8.10 | 3.94E-06 |
| A0A0C4DH72 | 8.04 | 2.62E-05 |
| P55058     | 7.99 | 1.78E-07 |
| Q00839     | 7.99 | 1.86E-07 |
| P80404     | 7.98 | 9.56E-08 |
| Q6UXN8     | 7.93 | 6.45E-08 |
| P50440     | 7.90 | 5.31E-07 |
| Q12765     | 7.83 | 1.57E-06 |
| A0A075B6K4 | 7.74 | 2.44E-04 |
| P17900     | 7.71 | 2.04E-05 |
| P05413     | 7.69 | 1.44E-06 |
| P25942     | 7.68 | 1.40E-06 |
| P00751     | 7.67 | 1.49E-03 |
| P78310     | 7.66 | 1.57E-06 |
| P0DOY3     | 7.55 | 1.06E-07 |
| P12111     | 7.44 | 4.34E-06 |
| Q96HD9     | 7.43 | 5.32E-06 |
| Q9Y5Z4     | 7.41 | 7.86E-07 |
| P07686     | 7.29 | 1.99E-07 |
| Q9GZP4     | 7.28 | 5.17E-05 |
| P28300     | 7.23 | 2.47E-05 |
| Q16822     | 7.19 | 1.06E-04 |
| O43399     | 7.16 | 3.06E-06 |
| Q14210     | 7.15 | 4.06E-03 |
| P01714     | 7.07 | 1.09E-06 |

|            |      |          |
|------------|------|----------|
| Q9NUM4     | 7.02 | 2.84E-06 |
| Q07075     | 6.86 | 1.05E-04 |
| O14618     | 6.85 | 6.45E-08 |
| Q8N2U0     | 6.81 | 6.33E-05 |
| O96033     | 6.79 | 8.64E-06 |
| A0A075B6K5 | 6.79 | 3.56E-05 |
| P55957     | 6.73 | 1.87E-08 |
| Q13740     | 6.69 | 1.87E-07 |
| P12318     | 6.63 | 1.33E-05 |
| P00742     | 6.62 | 8.55E-07 |
| P19652     | 6.58 | 2.45E-06 |
| Q9Y696     | 6.53 | 2.71E-06 |
| Q16531     | 6.49 | 2.63E-04 |
| P04211     | 6.47 | 8.98E-07 |
| P09382     | 6.36 | 3.27E-06 |
| P11684     | 6.31 | 3.59E-03 |
| Q02487     | 6.31 | 1.03E-06 |
| P61970     | 6.29 | 1.68E-07 |
| P25311     | 6.28 | 7.89E-05 |
| Q9UHI7     | 6.27 | 4.57E-07 |
| Q8NFQ8     | 6.18 | 4.87E-06 |
| Q99988     | 6.17 | 1.34E-04 |
| A0A075B6S5 | 6.12 | 1.75E-04 |
| Q08431     | 6.10 | 1.87E-06 |
| O00754     | 6.01 | 8.98E-08 |
| P01599     | 5.96 | 7.02E-05 |
| P01624     | 5.91 | 2.80E-05 |
| P01911     | 5.90 | 3.73E-06 |
| A0PJK1     | 5.88 | 2.77E-06 |
| P09668     | 5.81 | 3.55E-06 |
| P30047     | 5.66 | 8.21E-06 |
| P19320     | 5.60 | 1.10E-04 |
| Q10567     | 5.59 | 8.47E-04 |
| P04066     | 5.56 | 2.62E-06 |
| P07306     | 5.55 | 5.52E-05 |
| O14745     | 5.54 | 2.97E-06 |
| Q7Z7D3     | 5.53 | 3.75E-05 |
| Q5T2W1     | 5.52 | 2.07E-07 |
| P02452     | 5.51 | 3.41E-05 |
| Q96JY6     | 5.41 | 1.19E-04 |
| P19438     | 5.27 | 4.46E-07 |
| P30101     | 5.25 | 1.79E-05 |
| Q9HD89     | 5.25 | 3.68E-04 |
| P25774     | 5.24 | 1.56E-06 |
| P02656     | 5.22 | 7.02E-05 |
| A0A075B6I0 | 5.19 | 3.41E-05 |
| P16422     | 5.16 | 2.54E-03 |
| P01699     | 5.10 | 1.67E-06 |

|            |      |          |
|------------|------|----------|
| Q86VB7     | 5.06 | 2.22E-06 |
| Q96HE7     | 5.05 | 1.46E-02 |
| P01715     | 5.04 | 1.08E-06 |
| P50225     | 5.04 | 3.20E-03 |
| P46108     | 5.00 | 1.99E-04 |
| P07148     | 4.97 | 7.81E-06 |
| P35558     | 4.85 | 4.16E-06 |
| P01701     | 4.83 | 1.64E-05 |
| P48551     | 4.80 | 1.06E-04 |
| Q15517     | 4.80 | 1.97E-05 |
| P22897     | 4.80 | 1.20E-04 |
| Q8N357     | 4.78 | 8.22E-06 |
| P18428     | 4.77 | 2.74E-06 |
| P0DOX7     | 4.75 | 3.56E-05 |
| Q07812     | 4.67 | 4.65E-05 |
| Q16563     | 4.64 | 2.89E-05 |
| P09327     | 4.62 | 1.40E-05 |
| P35080     | 4.61 | 8.07E-06 |
| O96009     | 4.59 | 1.45E-05 |
| Q9BRA2     | 4.57 | 1.44E-06 |
| Q8NCC3     | 4.53 | 4.27E-06 |
| P07339     | 4.53 | 3.63E-07 |
| P01860     | 4.52 | 1.58E-03 |
| Q99653     | 4.49 | 6.69E-06 |
| Q6ZNA5     | 4.49 | 4.27E-06 |
| P01721     | 4.49 | 5.60E-05 |
| Q15185     | 4.48 | 1.08E-05 |
| P29279     | 4.47 | 5.69E-06 |
| Q9Y6H1     | 4.47 | 1.52E-04 |
| P02788     | 4.46 | 2.64E-02 |
| P49913     | 4.45 | 1.74E-04 |
| Q96IU4     | 4.45 | 8.42E-05 |
| Q9UM22     | 4.30 | 2.74E-06 |
| Q6ZVN8     | 4.29 | 1.58E-04 |
| P01619     | 4.27 | 9.44E-04 |
| Q9NS15     | 4.23 | 7.33E-04 |
| Q9UK55     | 4.23 | 7.78E-04 |
| P08123     | 4.23 | 3.06E-06 |
| P02741     | 4.20 | 2.52E-05 |
| P39060     | 4.18 | 3.93E-07 |
| P02794     | 4.18 | 5.14E-03 |
| P18084     | 4.17 | 1.06E-04 |
| P17405     | 4.17 | 7.86E-07 |
| P20774     | 4.16 | 3.96E-05 |
| A0A0A0MRZ8 | 4.14 | 7.55E-05 |
| O00499     | 4.13 | 2.92E-05 |
| A0A075B6J9 | 4.11 | 7.46E-03 |
| Q9BS26     | 4.11 | 1.88E-06 |

|            |      |          |
|------------|------|----------|
| P08237     | 4.10 | 4.24E-05 |
| Q03405     | 4.10 | 5.71E-05 |
| P54727     | 4.10 | 1.37E-05 |
| P04626     | 4.09 | 6.78E-03 |
| Q9UJ14     | 4.08 | 7.13E-05 |
| P16401     | 4.06 | 2.08E-02 |
| A0A0B4J1Y8 | 4.06 | 1.63E-02 |
| Q15847     | 4.06 | 4.78E-04 |
| P00505     | 4.06 | 7.83E-04 |
| A0A0C4DH68 | 4.03 | 1.08E-03 |
| P08238     | 4.02 | 1.16E-06 |
| Q8IWY4     | 4.01 | 2.30E-04 |
| Q9BTY2     | 4.01 | 9.25E-06 |
| Q7L5L3     | 4.00 | 1.35E-03 |
| P23297     | 3.99 | 2.69E-03 |
| P04080     | 3.97 | 1.87E-02 |
| P07858     | 3.94 | 4.65E-05 |
| P15586     | 3.93 | 5.47E-07 |
| Q6GTX8     | 3.93 | 1.37E-06 |
| P28799     | 3.90 | 3.26E-04 |
| Q5KU26     | 3.88 | 1.44E-02 |
| O00584     | 3.88 | 2.10E-05 |
| P13693     | 3.88 | 1.22E-03 |
| Q9NP84     | 3.87 | 4.38E-02 |
| Q9Y274     | 3.85 | 1.00E-03 |
| Q96TA1     | 3.79 | 1.87E-02 |
| P13797     | 3.76 | 2.00E-03 |
| P06865     | 3.76 | 7.93E-06 |
| Q16581     | 3.74 | 3.27E-06 |
| P12259     | 3.73 | 2.53E-06 |
| Q9Y6R1     | 3.70 | 4.44E-04 |
| P01861     | 3.70 | 1.01E-02 |
| P26572     | 3.70 | 4.62E-03 |
| Q695T7     | 3.68 | 2.49E-04 |
| O75022     | 3.67 | 8.42E-05 |
| P08571     | 3.67 | 2.22E-04 |
| P15529     | 3.66 | 3.60E-06 |
| P81605     | 3.66 | 9.27E-04 |
| Q969Z4     | 3.65 | 1.64E-05 |
| P01703     | 3.59 | 2.01E-04 |
| Q02747     | 3.59 | 4.87E-03 |
| P14209     | 3.58 | 1.77E-02 |
| O43155     | 3.58 | 3.78E-03 |
| P27824     | 3.56 | 1.09E-03 |
| Q6E0U4     | 3.55 | 6.35E-03 |
| P27348     | 3.49 | 1.10E-04 |
| A6NDG6     | 3.49 | 2.10E-02 |
| P13667     | 3.48 | 2.00E-05 |



|                            |      |          |
|----------------------------|------|----------|
| P23083                     | 3.46 | 2.20E-02 |
| P27487                     | 3.45 | 3.24E-05 |
| Q15084                     | 3.44 | 6.53E-04 |
| P01593                     | 3.44 | 5.29E-04 |
| ENSEMBL:ENSBTAP00000007350 | 3.42 | 9.43E-04 |
| P37840                     | 3.39 | 4.25E-03 |
| P15374                     | 3.39 | 6.89E-06 |
| Q86YD5                     | 3.38 | 3.82E-03 |
| A0A0J9YXX1                 | 3.38 | 8.45E-05 |
| P21980                     | 3.38 | 4.33E-02 |
| Q96IQ7                     | 3.38 | 2.23E-02 |
| P08779                     | 3.37 | 2.54E-02 |
| P14780                     | 3.35 | 3.00E-02 |
| P35606                     | 3.35 | 6.53E-04 |
| O00299                     | 3.34 | 1.71E-05 |
| Q9Y275                     | 3.34 | 3.40E-04 |
| P11279                     | 3.33 | 2.01E-04 |
| Q92542                     | 3.32 | 1.64E-03 |
| P62195                     | 3.32 | 1.09E-02 |
| P12814                     | 3.32 | 2.03E-05 |
| P31947                     | 3.31 | 3.69E-02 |
| Q15435                     | 3.29 | 1.40E-03 |
| A0A087WSX0                 | 3.29 | 4.27E-03 |
| Q14847                     | 3.28 | 4.26E-05 |
| Q15907                     | 3.26 | 3.76E-05 |
| Q15833                     | 3.25 | 1.22E-03 |
| P22004                     | 3.23 | 6.14E-04 |
| Q15828                     | 3.21 | 8.83E-03 |
| Q9BXN2                     | 3.19 | 1.45E-05 |
| Q13621                     | 3.14 | 5.79E-05 |
| O00182                     | 3.14 | 5.37E-05 |
| P02511                     | 3.14 | 5.06E-04 |
| Q8WWV6                     | 3.12 | 3.84E-04 |
| Q5JXA9                     | 3.12 | 2.10E-05 |
| Q99650                     | 3.10 | 6.88E-04 |
| P01344                     | 3.08 | 1.05E-04 |
| P43652                     | 3.08 | 6.82E-05 |
| O00264                     | 3.08 | 4.58E-05 |
| P15144                     | 3.07 | 8.36E-03 |
| A6NI73                     | 3.04 | 1.45E-04 |
| P36941                     | 3.03 | 6.69E-03 |
| P10619                     | 3.03 | 6.82E-05 |
| Q01151                     | 3.02 | 2.72E-02 |
| P35527                     | 3.02 | 4.15E-02 |
| P06681                     | 3.01 | 8.67E-03 |
| P00740                     | 3.01 | 5.76E-03 |
| Q15223                     | 3.00 | 4.07E-06 |
| P78325                     | 2.96 | 1.79E-02 |

|            |      |          |
|------------|------|----------|
| O43405     | 2.95 | 7.09E-03 |
| P35237     | 2.94 | 2.18E-03 |
| P36957     | 2.93 | 1.29E-03 |
| Q8N386     | 2.93 | 1.08E-04 |
| Q9Y3B3     | 2.93 | 3.51E-05 |
| O15540     | 2.92 | 3.28E-02 |
| P37802     | 2.92 | 8.52E-04 |
| Q9BUPO     | 2.90 | 3.03E-03 |
| Q9BUH6     | 2.89 | 9.85E-04 |
| Q9HAT2     | 2.86 | 1.09E-04 |
| A0A075B6Q5 | 2.83 | 1.31E-03 |
| P17050     | 2.82 | 1.72E-04 |
| Q9NPY3     | 2.82 | 6.68E-04 |
| Q9UNF0     | 2.81 | 2.16E-04 |
| P49006     | 2.81 | 1.06E-02 |
| P30044     | 2.79 | 1.55E-04 |
| Q9HB90     | 2.79 | 2.79E-02 |
| P07359     | 2.78 | 9.27E-04 |
| O15394     | 2.78 | 2.97E-02 |
| Q8WWB7     | 2.78 | 1.90E-04 |
| Q93050     | 2.78 | 1.11E-04 |
| Q96CX2     | 2.76 | 8.25E-04 |
| P30043     | 2.75 | 3.03E-03 |
| Q13291     | 2.75 | 5.23E-03 |
| P98172     | 2.75 | 2.61E-04 |
| Q13332     | 2.74 | 1.44E-02 |
| P24592     | 2.74 | 1.96E-02 |
| Q96C19     | 2.73 | 7.68E-03 |
| Q13361     | 2.73 | 2.19E-03 |
| Q02083     | 2.73 | 2.37E-02 |
| Q15904     | 2.71 | 2.80E-03 |
| A0A0B4J2D9 | 2.70 | 2.57E-02 |
| P04179     | 2.70 | 1.58E-02 |
| P02790     | 2.69 | 7.15E-05 |
| P00167     | 2.68 | 5.97E-04 |
| P00450     | 2.68 | 1.66E-03 |
| P26038     | 2.66 | 2.91E-04 |
| P07602     | 2.66 | 1.60E-04 |
| Q8NHP8     | 2.66 | 3.56E-05 |
| P17936     | 2.66 | 2.38E-03 |
| Q12794     | 2.65 | 6.00E-03 |
| P62942     | 2.65 | 1.67E-02 |
| P36897     | 2.64 | 2.96E-03 |
| Q13200     | 2.63 | 2.22E-02 |
| Q92485     | 2.63 | 3.65E-03 |
| O75936     | 2.62 | 3.98E-04 |
| P0DOX5     | 2.59 | 8.81E-05 |
| Q5JS37     | 2.57 | 9.56E-04 |

|            |      |          |
|------------|------|----------|
| A2NJV5     | 2.55 | 4.25E-03 |
| Q96MU8     | 2.55 | 1.92E-04 |
| Q92734     | 2.54 | 4.29E-03 |
| Q8NC42     | 2.53 | 1.06E-04 |
| Q14315     | 2.52 | 1.07E-03 |
| P54803     | 2.51 | 6.53E-04 |
| A0A0J9YX35 | 2.51 | 3.59E-03 |
| Q9H665     | 2.48 | 5.36E-04 |
| P21583     | 2.47 | 6.79E-03 |
| A0A075B6H9 | 2.46 | 3.97E-03 |
| P16234     | 2.45 | 2.35E-04 |
| Q7Z6A9     | 2.45 | 4.40E-02 |
| P06312     | 2.45 | 1.14E-02 |
| O14786     | 2.44 | 1.98E-02 |
| P06331     | 2.44 | 3.28E-03 |
| P30046     | 2.44 | 6.78E-03 |
| P61916     | 2.44 | 8.22E-06 |
| Q07837     | 2.43 | 2.74E-03 |
| Q9Y646     | 2.42 | 1.28E-03 |
| O95084     | 2.42 | 3.61E-02 |
| P07237     | 2.41 | 4.37E-02 |
| Q99795     | 2.40 | 3.60E-04 |
| Q9BXS4     | 2.40 | 6.10E-03 |
| P48960     | 2.39 | 3.11E-02 |
| O75503     | 2.39 | 1.92E-04 |
| Q92520     | 2.38 | 6.33E-05 |
| P01229     | 2.37 | 5.01E-04 |
| Q9NQW7     | 2.36 | 5.46E-03 |
| P15311     | 2.36 | 1.84E-03 |
| Q13183     | 2.35 | 8.69E-04 |
| Q8NHL6     | 2.35 | 5.44E-03 |
| Q9BVK6     | 2.33 | 1.69E-02 |
| O15204     | 2.33 | 3.18E-02 |
| Q02985     | 2.32 | 3.83E-04 |
| P06858     | 2.32 | 2.76E-03 |
| Q9HBR0     | 2.31 | 1.23E-04 |
| P51688     | 2.30 | 1.55E-02 |
| Q9HC35     | 2.29 | 2.24E-03 |
| P28838     | 2.29 | 1.03E-02 |
| Q96AP7     | 2.28 | 1.12E-02 |
| Q9H0U4     | 2.28 | 5.45E-03 |
| P25325     | 2.27 | 2.44E-03 |
| P21333     | 2.27 | 2.47E-03 |
| P22223     | 2.27 | 7.91E-03 |
| P50570     | 2.26 | 6.91E-03 |
| P41222     | 2.26 | 7.99E-03 |
| P20062     | 2.26 | 3.49E-03 |
| P05023     | 2.25 | 2.69E-02 |

|                   |      |          |
|-------------------|------|----------|
| Q9UNZ2            | 2.23 | 4.92E-02 |
| P01011            | 2.23 | 5.93E-03 |
| Q9Y6E0            | 2.21 | 3.80E-03 |
| Q9BYE9            | 2.21 | 4.80E-03 |
| O60814            | 2.21 | 6.20E-03 |
| Q9BSG0            | 2.20 | 2.24E-03 |
| P20933            | 2.20 | 3.67E-05 |
| P51570            | 2.20 | 1.02E-04 |
| Q15043            | 2.18 | 4.30E-03 |
| O00338            | 2.18 | 1.28E-03 |
| Q96LD4            | 2.17 | 1.95E-04 |
| TREMBL:Q3ZBS7     | 2.16 | 8.70E-03 |
| P46940            | 2.16 | 2.86E-02 |
| P01127            | 2.16 | 2.75E-02 |
| SWISS-PROT:P19012 | 2.14 | 7.35E-03 |
| Q9H008            | 2.14 | 3.13E-02 |
| P35241            | 2.13 | 2.05E-04 |
| Q13228            | 2.12 | 2.78E-03 |
| O15118            | 2.11 | 5.34E-04 |
| P20827            | 2.11 | 1.09E-03 |
| P28332            | 2.11 | 4.98E-02 |
| Q96GP6            | 2.08 | 4.87E-03 |
| O00468            | 2.07 | 4.70E-02 |
| P17980            | 2.07 | 9.91E-03 |
| P20138            | 2.07 | 2.69E-03 |
| O43776            | 2.05 | 2.83E-02 |
| P61006            | 2.05 | 1.42E-02 |
| A0A0C4DH38        | 2.04 | 2.29E-02 |
| A0A0A0MS15        | 2.03 | 1.89E-02 |
| Q9UJ99            | 2.03 | 3.09E-02 |
| Q9UNN8            | 0.50 | 3.26E-03 |
| Q9BQ51            | 0.49 | 1.55E-02 |
| Q6UX71            | 0.49 | 7.09E-03 |
| Q08174            | 0.48 | 4.95E-02 |
| Q01973            | 0.48 | 3.47E-02 |
| O14498            | 0.46 | 2.89E-02 |
| Q02413            | 0.45 | 4.86E-02 |
| P30530            | 0.45 | 1.01E-03 |
| P19022            | 0.44 | 2.86E-02 |
| Q7KYR7            | 0.43 | 9.98E-03 |
| O43633            | 0.42 | 3.14E-02 |
| Q9UN37            | 0.41 | 2.51E-02 |
| Q8WUM4            | 0.40 | 1.71E-02 |
| Q9Y653            | 0.40 | 4.49E-02 |
| P05155            | 0.40 | 3.61E-02 |
| P05067            | 0.40 | 4.40E-02 |
| Q04721            | 0.40 | 4.29E-02 |
| Q12864            | 0.40 | 2.13E-02 |

|        |      |          |
|--------|------|----------|
| P04180 | 0.39 | 9.00E-03 |
| Q9ULK6 | 0.38 | 3.31E-02 |
| Q9HC56 | 0.38 | 4.95E-02 |
| P14784 | 0.37 | 2.43E-02 |
| O75144 | 0.37 | 7.33E-03 |
| P41217 | 0.35 | 1.80E-02 |
| P02768 | 0.35 | 3.98E-02 |
| Q08334 | 0.35 | 2.25E-02 |
| P25940 | 0.35 | 1.09E-02 |
| Q9UBG0 | 0.35 | 4.75E-03 |
| Q86YT9 | 0.35 | 1.78E-02 |
| Q8NBJ4 | 0.34 | 4.58E-02 |
| P19256 | 0.33 | 7.95E-03 |
| P0C7U0 | 0.33 | 1.91E-02 |
| Q86UX2 | 0.33 | 4.49E-02 |
| P02462 | 0.32 | 3.14E-02 |
| Q8N2G4 | 0.32 | 4.33E-02 |
| Q9NPF0 | 0.32 | 1.63E-02 |
| P13598 | 0.32 | 6.22E-03 |
| P50148 | 0.31 | 2.84E-02 |
| Q8N3J6 | 0.31 | 4.97E-02 |
| Q7Z7G0 | 0.31 | 3.41E-02 |
| Q5SZK8 | 0.30 | 5.44E-03 |
| P11362 | 0.30 | 2.69E-02 |
| Q9NQS3 | 0.30 | 4.26E-03 |
| P04746 | 0.29 | 4.79E-02 |
| P13591 | 0.29 | 1.58E-02 |
| Q6UXD5 | 0.29 | 4.38E-02 |
| Q6UXG3 | 0.29 | 1.01E-02 |
| Q8TBP5 | 0.29 | 1.60E-02 |
| Q96PD5 | 0.29 | 3.07E-02 |
| P48745 | 0.29 | 3.14E-02 |
| P24855 | 0.28 | 6.86E-03 |
| Q9P2B2 | 0.28 | 1.68E-02 |
| O75351 | 0.27 | 1.63E-02 |
| P09619 | 0.26 | 1.40E-03 |
| Q92859 | 0.26 | 1.40E-03 |
| O75339 | 0.26 | 1.13E-02 |
| P01042 | 0.26 | 3.47E-02 |
| Q13443 | 0.26 | 1.04E-02 |
| Q96RW7 | 0.25 | 1.67E-02 |
| P15151 | 0.25 | 7.23E-03 |
| Q9Y2G1 | 0.25 | 9.12E-03 |
| Q7LBR1 | 0.25 | 1.34E-02 |
| P08697 | 0.25 | 4.37E-02 |
| Q86XT2 | 0.25 | 4.33E-02 |
| Q12860 | 0.25 | 2.52E-02 |
| Q15262 | 0.24 | 5.44E-03 |

|        |      |          |
|--------|------|----------|
| Q6EMK4 | 0.23 | 1.58E-02 |
| Q9NP85 | 0.23 | 1.10E-02 |
| Q9UK41 | 0.23 | 7.08E-03 |
| Q9BY67 | 0.23 | 2.69E-02 |
| Q96NY8 | 0.23 | 1.55E-02 |
| P31997 | 0.22 | 4.51E-02 |
| Q9UGT4 | 0.22 | 2.52E-02 |
| P11047 | 0.22 | 1.56E-03 |
| P16035 | 0.22 | 9.57E-03 |
| Q9H741 | 0.22 | 7.20E-03 |
| Q9HD42 | 0.21 | 3.86E-02 |
| Q86TH1 | 0.21 | 2.51E-02 |
| P16112 | 0.21 | 1.40E-02 |
| P02774 | 0.20 | 7.95E-03 |
| P26992 | 0.20 | 9.81E-03 |
| Q99835 | 0.19 | 7.49E-04 |
| Q6V0I7 | 0.19 | 1.80E-02 |
| Q9HBB8 | 0.19 | 1.63E-02 |
| Q8TB96 | 0.18 | 1.27E-03 |
| P35858 | 0.18 | 3.14E-02 |
| Q96JQ0 | 0.18 | 1.84E-03 |
| P98095 | 0.18 | 3.09E-02 |
| P29323 | 0.16 | 1.49E-04 |
| P12273 | 0.14 | 1.73E-02 |
| P04745 | 0.14 | 2.92E-02 |
| Q9H444 | 0.14 | 3.62E-02 |
| Q6UVK1 | 0.13 | 4.63E-02 |
| P23327 | 0.13 | 3.76E-02 |
| Q14574 | 0.13 | 3.44E-02 |
| P39059 | 0.13 | 4.38E-02 |
| Q9P121 | 0.12 | 3.61E-02 |
| Q8NDA2 | 0.12 | 1.01E-02 |
| Q14982 | 0.11 | 4.86E-02 |
| P55017 | 0.10 | 7.20E-03 |
| Q9HCU0 | 0.09 | 1.74E-03 |
| P80370 | 0.09 | 1.36E-02 |
| Q5JRA6 | 0.07 | 1.78E-02 |

| F9                 |             |          |
|--------------------|-------------|----------|
| Protein Accessions | Fold Change | P value  |
| P01225             | 29.30       | 1.51E-07 |
| P69905             | 15.70       | 7.37E-04 |
| P14780             | 6.99        | 3.16E-03 |
| P01215             | 5.81        | 1.67E-04 |
| P00915             | 5.75        | 1.13E-02 |
| P01229             | 5.16        | 2.27E-05 |
| P54793             | 4.65        | 1.74E-03 |
| Q8N2U0             | 4.47        | 1.96E-03 |
| P02792             | 4.13        | 9.95E-03 |
| P01700             | 4.12        | 9.78E-06 |
| O75015             | 3.34        | 4.97E-02 |
| P0DOX6             | 3.30        | 1.77E-03 |
| A0A0J9YX35         | 3.16        | 7.47E-03 |
| Q96LD4             | 3.05        | 3.98E-05 |
| P01871             | 3.02        | 6.45E-03 |
| P01911             | 3.01        | 1.82E-02 |
| Q7L5L3             | 2.98        | 2.44E-02 |
| P32119             | 2.93        | 2.82E-02 |
| P01859             | 2.88        | 2.32E-02 |
| A0A0C4DH68         | 2.77        | 6.45E-03 |
| A2NJV5             | 2.55        | 4.29E-02 |
| O94832             | 2.48        | 9.95E-03 |
| P01780             | 2.47        | 6.45E-03 |
| Q9HAU8             | 2.32        | 5.86E-03 |
| P15814             | 2.30        | 4.97E-02 |
| P0DOX8             | 2.25        | 4.87E-02 |
| P01011             | 2.24        | 4.97E-02 |
| P22748             | 2.24        | 2.51E-02 |
| Q13621             | 2.23        | 2.41E-02 |
| P00441             | 2.04        | 4.97E-02 |
| P01715             | 2.02        | 3.33E-02 |
| A0A0B4J1U7         | 2.01        | 3.72E-02 |
| Q6UXB4             | 0.47        | 2.96E-02 |
| Q9UNN8             | 0.47        | 2.75E-02 |
| P30530             | 0.43        | 1.13E-02 |
| Q14194             | 0.14        | 3.48E-02 |

| F10                |             |          |
|--------------------|-------------|----------|
| Protein Accessions | Fold Change | P value  |
| Q15293             | 68.15       | 1.57E-09 |
| P61769             | 59.84       | 1.57E-09 |
| A0A0B4J2D9         | 38.05       | 9.33E-06 |
| P02750             | 32.50       | 1.19E-08 |
| P02763             | 25.51       | 1.57E-09 |
| P00915             | 21.52       | 2.59E-07 |
| P05534             | 19.25       | 1.57E-09 |
| P12104             | 18.94       | 1.52E-07 |
| P11684             | 18.37       | 7.31E-06 |
| O75368             | 18.06       | 7.35E-09 |
| Q9NWW4             | 15.74       | 6.23E-07 |
| A0A087WSX0         | 13.97       | 2.59E-07 |
| P19652             | 13.50       | 9.88E-07 |
| P20774             | 13.41       | 1.91E-08 |
| P01717             | 12.90       | 1.11E-08 |
| Q9UBR2             | 12.62       | 5.28E-10 |
| Q9P1F3             | 10.90       | 3.08E-07 |
| P01019             | 10.76       | 1.19E-08 |
| P00738             | 10.47       | 3.72E-05 |
| P18465             | 10.14       | 4.00E-08 |
| P25311             | 10.09       | 5.80E-06 |
| P55103             | 9.95        | 8.36E-07 |
| P27824             | 9.87        | 1.38E-06 |
| P30508             | 9.69        | 2.41E-06 |
| P14207             | 8.91        | 5.46E-05 |
| Q9NR99             | 8.86        | 1.51E-02 |
| Q9UK55             | 8.36        | 1.16E-05 |
| P01703             | 8.33        | 7.98E-07 |
| P08833             | 8.32        | 2.04E-04 |
| Q969H8             | 8.26        | 1.16E-05 |
| Q99972             | 8.10        | 7.98E-07 |
| Q92530             | 8.09        | 5.99E-07 |
| P19320             | 7.92        | 1.87E-05 |
| P22692             | 7.64        | 2.09E-02 |
| O00244             | 7.61        | 2.01E-04 |
| A0A0C4DH72         | 7.40        | 1.38E-04 |
| Q9UHI8             | 7.40        | 2.55E-05 |



|            |      |          |
|------------|------|----------|
| Q15435     | 7.34 | 2.62E-05 |
| Q5JTV8     | 7.33 | 2.06E-06 |
| P01011     | 7.27 | 9.84E-07 |
| P01714     | 7.19 | 7.23E-06 |
| P03951     | 7.07 | 4.00E-05 |
| A0A075B6K5 | 6.83 | 7.36E-05 |
| Q13421     | 6.60 | 7.41E-05 |
| P07359     | 6.57 | 1.44E-06 |
| P05413     | 6.54 | 1.56E-05 |
| Q9H8J5     | 6.47 | 7.23E-06 |
| Q16661     | 6.47 | 6.60E-03 |
| P33151     | 6.28 | 2.09E-04 |
| O00754     | 6.22 | 4.49E-07 |
| P01903     | 6.19 | 3.72E-02 |
| Q9UHY7     | 6.16 | 3.25E-06 |
| P01599     | 6.10 | 6.76E-05 |
| Q9UBP4     | 6.06 | 6.66E-05 |
| P0DOX8     | 5.87 | 4.48E-06 |
| Q9UHL4     | 5.86 | 6.97E-05 |
| Q9NUM4     | 5.80 | 1.38E-04 |
| P01008     | 5.77 | 4.37E-07 |
| P36980     | 5.57 | 2.91E-05 |
| O43556     | 5.55 | 2.59E-07 |
| P01721     | 5.49 | 8.31E-05 |
| P27797     | 5.43 | 2.73E-04 |
| Q93091     | 5.41 | 5.69E-05 |
| P53634     | 5.34 | 2.59E-07 |
| P07360     | 5.32 | 1.20E-05 |
| P21583     | 5.32 | 2.27E-05 |
| O95980     | 5.23 | 5.19E-03 |
| P15814     | 5.21 | 5.55E-06 |
| P02787     | 5.18 | 8.02E-05 |
| A0A075B6S5 | 5.14 | 5.72E-05 |
| P02741     | 5.13 | 1.38E-06 |
| Q8IX05     | 5.11 | 1.73E-05 |
| P02655     | 5.09 | 4.22E-05 |
| A0A075B6Q5 | 5.05 | 3.95E-03 |
| Q92954     | 5.04 | 1.71E-03 |
| P02790     | 5.03 | 1.71E-06 |

|            |      |          |
|------------|------|----------|
| A0A075B6I0 | 5.01 | 2.67E-03 |
| P31151     | 4.99 | 9.88E-03 |
| O00468     | 4.98 | 1.53E-03 |
| A0A075B6K4 | 4.98 | 4.28E-04 |
| P01715     | 4.93 | 2.64E-06 |
| P17900     | 4.89 | 1.24E-03 |
| Q9Y6X5     | 4.86 | 2.62E-05 |
| P08185     | 4.79 | 9.84E-07 |
| P02656     | 4.77 | 3.00E-04 |
| P18428     | 4.68 | 8.20E-06 |
| P09382     | 4.67 | 3.12E-04 |
| P20142     | 4.67 | 4.00E-03 |
| P43652     | 4.67 | 3.25E-06 |
| P01911     | 4.63 | 5.90E-05 |
| A0A0C4DH68 | 4.60 | 9.05E-06 |
| Q86SG5     | 4.59 | 2.30E-02 |
| Q13740     | 4.44 | 2.64E-06 |
| Q9Y547     | 4.43 | 3.20E-03 |
| P0C0L4     | 4.29 | 1.93E-05 |
| P02748     | 4.29 | 3.70E-06 |
| P04217     | 4.28 | 8.34E-04 |
| O76076     | 4.26 | 1.95E-03 |
| P01860     | 4.24 | 4.70E-03 |
| P02792     | 4.20 | 1.10E-03 |
| P04211     | 4.17 | 2.52E-05 |
| P06312     | 4.12 | 2.74E-04 |
| P04216     | 4.06 | 2.59E-07 |
| Q8N2U0     | 4.04 | 4.47E-04 |
| Q6UXB8     | 3.95 | 7.94E-04 |
| Q9UDY2     | 3.92 | 1.17E-03 |
| Q14376     | 3.92 | 1.15E-03 |
| P36969     | 3.90 | 1.27E-03 |
| Q96FW1     | 3.87 | 4.64E-03 |
| Q9H299     | 3.81 | 1.94E-02 |
| Q9BTY2     | 3.80 | 3.78E-05 |
| Q99988     | 3.79 | 9.81E-03 |
| O00584     | 3.78 | 1.80E-04 |
| O00499     | 3.77 | 1.99E-04 |
| P17050     | 3.76 | 5.70E-05 |

|                   |      |          |
|-------------------|------|----------|
| P01619            | 3.74 | 4.64E-03 |
| P00441            | 3.74 | 3.13E-05 |
| P00747            | 3.73 | 2.82E-04 |
| P01701            | 3.73 | 2.34E-04 |
| Q8N126            | 3.70 | 5.42E-04 |
| P08571            | 3.69 | 5.98E-04 |
| P01699            | 3.66 | 3.86E-05 |
| P12318            | 3.66 | 5.35E-03 |
| Q14515            | 3.65 | 3.35E-02 |
| Q92743            | 3.65 | 2.11E-03 |
| P07306            | 3.64 | 3.95E-03 |
| P29966            | 3.58 | 3.97E-02 |
| P09228            | 3.58 | 3.21E-03 |
| A0A075B6J9        | 3.57 | 5.19E-03 |
| O00115            | 3.54 | 5.23E-05 |
| P25774            | 3.50 | 1.38E-04 |
| P01009            | 3.48 | 3.46E-05 |
| Q8NCW5            | 3.47 | 1.27E-03 |
| P02753            | 3.47 | 3.61E-04 |
| Q07075            | 3.47 | 2.38E-02 |
| SWISS-PROT:P02769 | 3.45 | 2.46E-02 |
| A0A0A0MRZ8        | 3.42 | 1.07E-02 |
| P01700            | 3.41 | 8.20E-06 |
| P01624            | 3.41 | 3.01E-03 |
| Q92765            | 3.40 | 1.43E-02 |
| Q9HAU8            | 3.40 | 1.29E-04 |
| Q9BZM5            | 3.38 | 2.59E-03 |
| Q92520            | 3.37 | 4.48E-06 |
| Q9UM22            | 3.37 | 9.01E-05 |
| O43491            | 3.36 | 3.02E-03 |
| Q9BW04            | 3.35 | 7.05E-03 |
| Q8NCC3            | 3.27 | 2.41E-04 |
| P37840            | 3.24 | 3.41E-03 |
| P00742            | 3.20 | 1.13E-03 |
| P35080            | 3.19 | 4.96E-03 |
| P21217            | 3.19 | 4.47E-04 |
| P28300            | 3.18 | 1.01E-03 |
| P23470            | 3.17 | 2.03E-05 |
| P14209            | 3.16 | 4.82E-02 |

|                   |      |          |
|-------------------|------|----------|
| Q02985            | 3.16 | 6.46E-05 |
| P00450            | 3.16 | 7.56E-04 |
| Q15113            | 3.10 | 1.10E-03 |
| Q14315            | 3.10 | 4.20E-04 |
| P02760            | 3.10 | 2.14E-03 |
| Q96IU4            | 3.08 | 3.20E-03 |
| Q9Y279            | 3.07 | 1.59E-02 |
| Q8IWY4            | 3.06 | 4.64E-03 |
| P06331            | 3.03 | 9.30E-04 |
| Q6UXN8            | 3.02 | 1.52E-02 |
| O15540            | 3.01 | 3.72E-02 |
| P78325            | 3.01 | 1.94E-02 |
| Q8NFQ8            | 3.00 | 1.10E-02 |
| P0DOX7            | 3.00 | 2.14E-03 |
| Q96FN5            | 3.00 | 2.61E-03 |
| O60234            | 2.98 | 3.87E-03 |
| Q15274            | 2.97 | 9.83E-03 |
| P00740            | 2.95 | 2.12E-03 |
| P09668            | 2.93 | 2.71E-04 |
| O96009            | 2.93 | 1.71E-03 |
| O15204            | 2.92 | 4.61E-02 |
| P12111            | 2.92 | 6.69E-03 |
| P01344            | 2.91 | 4.14E-04 |
| A0A0C4DH25        | 2.91 | 1.00E-02 |
| Q96C19            | 2.90 | 8.06E-03 |
| P0DOY3            | 2.89 | 9.27E-03 |
| A0A0B4J1U7        | 2.87 | 2.18E-04 |
| P07858            | 2.87 | 5.42E-04 |
| Q9NZ08            | 2.87 | 2.66E-03 |
| SWISS-PROT:P00978 | 2.84 | 5.19E-03 |
| Q9H0U4            | 2.83 | 1.35E-02 |
| Q9Y4L1            | 2.83 | 1.80E-02 |
| A2NJV5            | 2.82 | 3.40E-03 |
| P21796            | 2.81 | 2.46E-03 |
| Q5TON5            | 2.79 | 1.88E-02 |
| P54793            | 2.79 | 7.05E-03 |
| Q9Y5Z4            | 2.79 | 2.83E-03 |
| P51688            | 2.79 | 5.72E-03 |
| P54803            | 2.75 | 2.74E-04 |

|                   |      |          |
|-------------------|------|----------|
| P48551            | 2.74 | 1.51E-02 |
| Q9H6B4            | 2.74 | 2.83E-03 |
| P31025            | 2.72 | 1.29E-04 |
| Q92484            | 2.72 | 2.29E-02 |
| SWISS-PROT:P07724 | 2.71 | 5.57E-03 |
| P04233            | 2.70 | 1.69E-02 |
| P10619            | 2.70 | 4.86E-04 |
| A0A0C4DH38        | 2.70 | 4.64E-03 |
| Q8N114            | 2.68 | 2.82E-02 |
| Q92496            | 2.65 | 1.76E-03 |
| P23083            | 2.64 | 4.64E-03 |
| Q6YHK3            | 2.63 | 9.30E-04 |
| P07148            | 2.62 | 3.99E-03 |
| P83110            | 2.62 | 6.49E-03 |
| P07737            | 2.61 | 3.61E-04 |
| P19438            | 2.61 | 5.42E-04 |
| Q15155            | 2.60 | 4.25E-03 |
| Q6UWV6            | 2.58 | 4.00E-02 |
| Q14165            | 2.54 | 2.31E-03 |
| P78310            | 2.54 | 1.44E-02 |
| P05091            | 2.51 | 1.18E-02 |
| Q13361            | 2.51 | 1.90E-03 |
| Q9Y646            | 2.51 | 1.74E-03 |
| Q7L5L3            | 2.50 | 1.71E-02 |
| O75629            | 2.49 | 1.08E-02 |
| Q14019            | 2.49 | 1.23E-02 |
| P24592            | 2.48 | 4.57E-02 |
| Q96CX2            | 2.48 | 6.03E-03 |
| Q15121            | 2.47 | 3.36E-02 |
| Q9H6X2            | 2.46 | 2.19E-02 |
| Q9BVK6            | 2.42 | 2.54E-02 |
| P15848            | 2.41 | 5.19E-03 |
| P02671            | 2.41 | 1.47E-02 |
| Q9UGM5            | 2.41 | 3.03E-02 |
| P26641            | 2.39 | 3.54E-02 |
| Q16563            | 2.38 | 1.53E-02 |
| P35754            | 2.37 | 5.00E-02 |
| P67809            | 2.35 | 2.45E-02 |
| Q00325            | 2.35 | 1.20E-02 |

|            |      |          |
|------------|------|----------|
| Q9Y6R1     | 2.34 | 2.86E-02 |
| P15586     | 2.33 | 4.37E-04 |
| Q14126     | 2.32 | 8.49E-04 |
| P01229     | 2.32 | 1.35E-02 |
| Q9BTM9     | 2.32 | 2.35E-02 |
| O94919     | 2.31 | 2.85E-02 |
| Q14112     | 2.31 | 1.39E-02 |
| A0A0A0MS15 | 2.30 | 1.06E-02 |
| Q13057     | 2.29 | 4.62E-02 |
| P55058     | 2.28 | 5.69E-03 |
| Q8NHJ6     | 2.27 | 5.98E-03 |
| O00264     | 2.27 | 2.31E-03 |
| P01764     | 2.27 | 2.93E-02 |
| Q8NHP8     | 2.26 | 3.42E-04 |
| P04278     | 2.25 | 2.36E-02 |
| P27487     | 2.25 | 4.28E-03 |
| Q08431     | 2.25 | 1.41E-02 |
| P0C0L5     | 2.23 | 1.68E-02 |
| Q08830     | 2.23 | 4.29E-02 |
| Q13113     | 2.23 | 7.64E-03 |
| Q5JS37     | 2.22 | 7.75E-03 |
| P51884     | 2.21 | 7.15E-03 |
| P22223     | 2.21 | 1.68E-02 |
| O75531     | 2.21 | 1.80E-02 |
| P01859     | 2.20 | 2.65E-02 |
| Q9Y5Y7     | 2.19 | 3.03E-02 |
| P08236     | 2.18 | 7.25E-03 |
| P17405     | 2.17 | 7.53E-04 |
| P04066     | 2.16 | 1.62E-03 |
| Q14697     | 2.16 | 3.38E-02 |
| Q9HD89     | 2.14 | 5.19E-03 |
| P28070     | 2.13 | 1.35E-02 |
| P07585     | 2.11 | 3.40E-03 |
| P15374     | 2.09 | 2.66E-03 |
| Q6FHJ7     | 2.08 | 1.64E-02 |
| Q13510     | 2.08 | 2.14E-03 |
| Q08380     | 2.06 | 3.75E-03 |
| P02765     | 2.05 | 4.62E-02 |
| P00746     | 2.03 | 4.62E-02 |

|        |      |          |
|--------|------|----------|
| P15289 | 2.01 | 3.05E-02 |
| Q6GTX8 | 0.50 | 4.26E-02 |
| Q9UBG0 | 0.49 | 1.68E-02 |
| P98082 | 0.48 | 4.95E-02 |
| P98164 | 0.48 | 1.71E-02 |
| P00558 | 0.48 | 2.18E-02 |
| O75084 | 0.48 | 3.01E-02 |
| Q01973 | 0.47 | 4.67E-02 |
| P20827 | 0.47 | 3.03E-02 |
| Q6P531 | 0.46 | 4.82E-02 |
| O75891 | 0.46 | 2.88E-02 |
| O00161 | 0.45 | 4.79E-02 |
| P12259 | 0.45 | 4.33E-02 |
| Q9Y4D7 | 0.45 | 3.38E-02 |
| P09619 | 0.45 | 1.19E-02 |
| Q8NC42 | 0.44 | 3.79E-02 |
| Q13445 | 0.44 | 2.75E-03 |
| P13598 | 0.44 | 2.48E-02 |
| P11586 | 0.43 | 3.46E-02 |
| Q15223 | 0.43 | 1.44E-02 |
| Q9UJJ9 | 0.43 | 4.04E-02 |
| Q9UKU6 | 0.42 | 3.20E-02 |
| P10586 | 0.42 | 3.95E-03 |
| P06744 | 0.42 | 4.89E-02 |
| P15531 | 0.42 | 2.21E-02 |
| P21709 | 0.42 | 2.75E-02 |
| Q7KYR7 | 0.42 | 1.60E-02 |
| P04180 | 0.41 | 1.69E-02 |
| P34896 | 0.41 | 4.61E-02 |
| P09543 | 0.41 | 4.49E-02 |
| P26992 | 0.41 | 4.92E-02 |
| P51148 | 0.41 | 4.75E-02 |
| Q06418 | 0.40 | 2.38E-02 |
| P34932 | 0.40 | 3.33E-02 |
| P30086 | 0.40 | 2.13E-02 |
| P21281 | 0.40 | 9.83E-03 |
| Q99835 | 0.39 | 7.02E-03 |
| O75144 | 0.39 | 1.66E-02 |
| P23526 | 0.39 | 4.37E-02 |

|        |      |          |
|--------|------|----------|
| Q04760 | 0.39 | 2.70E-02 |
| P10768 | 0.38 | 4.61E-02 |
| Q8N386 | 0.38 | 1.62E-02 |
| Q9BXN2 | 0.38 | 3.36E-02 |
| Q9H4M9 | 0.38 | 8.15E-03 |
| O60494 | 0.37 | 7.75E-03 |
| O75339 | 0.37 | 3.36E-02 |
| Q6EMK4 | 0.37 | 4.76E-02 |
| Q8IWA5 | 0.37 | 4.06E-02 |
| O75351 | 0.37 | 4.59E-02 |
| P29323 | 0.37 | 1.86E-03 |
| Q9Y617 | 0.36 | 4.10E-02 |
| P0DMQ5 | 0.36 | 2.91E-02 |
| Q9P2T1 | 0.36 | 4.89E-02 |
| Q9Y6E0 | 0.36 | 3.08E-02 |
| Q9P0T7 | 0.36 | 4.92E-02 |
| P19022 | 0.36 | 2.33E-02 |
| Q86YT9 | 0.35 | 2.73E-02 |
| P78417 | 0.35 | 4.87E-02 |
| Q9UQB8 | 0.35 | 5.69E-04 |
| O75347 | 0.35 | 1.58E-02 |
| Q9NU53 | 0.34 | 1.19E-02 |
| P82980 | 0.34 | 3.98E-02 |
| Q15262 | 0.34 | 1.66E-02 |
| Q9ULK6 | 0.34 | 3.60E-02 |
| P11047 | 0.34 | 7.12E-03 |
| P19256 | 0.33 | 1.35E-02 |
| P02462 | 0.33 | 4.48E-02 |
| Q15833 | 0.33 | 3.78E-02 |
| O60361 | 0.33 | 2.42E-02 |
| P63096 | 0.33 | 3.52E-02 |
| P15151 | 0.33 | 1.91E-02 |
| Q6UXG3 | 0.33 | 2.01E-02 |
| Q6UX71 | 0.32 | 3.05E-03 |
| P16035 | 0.32 | 2.73E-02 |
| O75882 | 0.32 | 9.15E-03 |
| Q9HCU0 | 0.32 | 1.40E-02 |
| Q13443 | 0.31 | 2.27E-02 |
| Q9HC38 | 0.31 | 3.54E-02 |



|        |      |          |
|--------|------|----------|
| Q8IUL8 | 0.31 | 2.38E-02 |
| P47755 | 0.31 | 3.98E-02 |
| Q9UNW1 | 0.30 | 4.62E-02 |
| Q12913 | 0.30 | 3.03E-02 |
| Q8TB96 | 0.30 | 5.40E-03 |
| Q92673 | 0.30 | 1.65E-02 |
| Q9NQS3 | 0.30 | 3.16E-03 |
| Q13591 | 0.30 | 4.82E-02 |
| O00560 | 0.29 | 4.53E-02 |
| Q92859 | 0.29 | 3.63E-03 |
| P16070 | 0.29 | 1.51E-02 |
| Q9BY67 | 0.29 | 4.81E-02 |
| P15291 | 0.29 | 1.18E-02 |
| Q9HBB8 | 0.28 | 3.81E-02 |
| Q8N5I2 | 0.28 | 2.48E-02 |
| P24855 | 0.28 | 1.19E-02 |
| Q96RW7 | 0.28 | 2.86E-02 |
| P01042 | 0.27 | 4.88E-02 |
| Q12860 | 0.26 | 3.79E-02 |
| O94856 | 0.26 | 4.82E-02 |
| Q9HCM3 | 0.26 | 1.04E-02 |
| Q96DG6 | 0.26 | 3.03E-02 |
| Q15116 | 0.26 | 1.29E-02 |
| Q7Z7G0 | 0.25 | 3.12E-02 |
| O43895 | 0.25 | 2.91E-02 |
| P13489 | 0.25 | 2.91E-02 |
| Q6V0I7 | 0.24 | 3.35E-02 |
| Q8NBJ4 | 0.24 | 3.51E-02 |
| P58499 | 0.24 | 1.70E-02 |
| Q96JQ0 | 0.24 | 5.35E-03 |
| Q5SZK8 | 0.24 | 6.15E-03 |
| Q9UN37 | 0.24 | 1.24E-02 |
| Q8WUM4 | 0.24 | 8.83E-03 |
| P23284 | 0.22 | 1.39E-02 |
| Q6P9A2 | 0.22 | 1.87E-02 |
| Q9UEF7 | 0.22 | 3.67E-02 |
| Q99816 | 0.22 | 1.94E-02 |
| Q8NDA2 | 0.21 | 2.60E-02 |
| P22607 | 0.21 | 4.26E-02 |

|        |      |          |
|--------|------|----------|
| Q96MU8 | 0.21 | 1.58E-02 |
| Q9Y2G1 | 0.20 | 1.13E-02 |
| Q9Y5K6 | 0.20 | 1.66E-02 |
| P14784 | 0.20 | 1.35E-02 |
| P41217 | 0.20 | 1.13E-02 |
| Q9NR34 | 0.19 | 3.03E-02 |
| Q9UK41 | 0.19 | 9.40E-03 |
| Q9Y6W3 | 0.18 | 4.69E-02 |
| Q7LBR1 | 0.18 | 1.42E-02 |
| P55017 | 0.18 | 1.71E-02 |
| P50148 | 0.17 | 1.91E-02 |
| Q96EY5 | 0.17 | 7.75E-03 |
| Q9NP79 | 0.16 | 1.97E-02 |
| Q9H008 | 0.15 | 4.02E-03 |
| P0C7U0 | 0.14 | 1.03E-02 |
| Q9H1U4 | 0.13 | 9.26E-03 |
| P45877 | 0.11 | 6.09E-03 |
| Q9H9H4 | 0.10 | 1.51E-02 |
| Q9H444 | 0.10 | 4.14E-02 |
| P13688 | 0.07 | 4.88E-04 |
| P31997 | 0.06 | 3.02E-02 |

| F11                |             |          |
|--------------------|-------------|----------|
| Protein Accessions | Fold Change | P value  |
| P05534             | 20.44       | 2.03E-07 |
| P01911             | 19.95       | 3.80E-07 |
| Q86SG5             | 17.98       | 1.37E-05 |
| Q15293             | 16.09       | 9.38E-04 |
| P18465             | 14.92       | 2.17E-09 |
| P30508             | 13.84       | 2.02E-06 |
| P31151             | 13.04       | 2.92E-05 |
| P04179             | 12.61       | 3.80E-07 |
| P01721             | 12.59       | 1.46E-07 |
| P02750             | 12.02       | 7.60E-07 |
| P01699             | 11.98       | 1.13E-08 |
| A0A0C4DH72         | 11.95       | 7.89E-06 |
| P61769             | 10.46       | 1.31E-06 |
| P01717             | 10.32       | 1.36E-07 |
| P01701             | 9.76        | 3.80E-07 |
| P28065             | 9.54        | 1.13E-08 |
| Q92876             | 9.47        | 4.22E-04 |
| P01714             | 9.03        | 1.33E-06 |
| P02763             | 8.52        | 3.01E-06 |
| Q9Y547             | 8.47        | 2.32E-06 |
| P01703             | 8.32        | 1.42E-06 |
| P01903             | 8.18        | 1.64E-04 |
| Q13291             | 7.98        | 3.54E-06 |
| P13796             | 7.80        | 9.00E-06 |
| A0A075B6S5         | 7.37        | 1.17E-05 |
| O00244             | 7.27        | 1.92E-04 |
| P01700             | 7.11        | 3.74E-02 |
| P24158             | 7.08        | 2.70E-02 |
| Q9NWW4             | 6.93        | 5.22E-05 |
| P0DOX8             | 6.90        | 2.01E-06 |
| P01715             | 6.89        | 7.60E-07 |
| P06312             | 6.55        | 1.37E-05 |
| P05109             | 6.48        | 1.80E-02 |
| P01619             | 6.46        | 1.56E-04 |
| A0A075B6K5         | 6.40        | 2.01E-04 |
| Q07075             | 6.27        | 6.83E-04 |
| P01599             | 6.20        | 2.80E-04 |
| P15814             | 6.16        | 2.92E-05 |
| Q71DI3             | 6.11        | 3.87E-03 |
| Q9H299             | 6.06        | 1.86E-03 |
| P0DOX3             | 5.82        | 1.79E-03 |
| A0A0J9YXX1         | 5.80        | 1.23E-05 |
| Q9UBG3             | 5.75        | 1.80E-02 |

|            |      |          |
|------------|------|----------|
| P59666     | 5.62 | 1.61E-02 |
| Q15274     | 5.48 | 1.56E-04 |
| P01624     | 5.45 | 1.49E-04 |
| P06702     | 5.44 | 2.99E-02 |
| P23381     | 5.43 | 9.00E-06 |
| P02654     | 5.30 | 6.25E-05 |
| Q8N357     | 5.24 | 1.91E-05 |
| Q969H8     | 5.23 | 4.26E-04 |
| P02792     | 5.13 | 3.76E-04 |
| Q06495     | 5.10 | 1.09E-03 |
| Q92542     | 5.10 | 1.91E-04 |
| Q9NZT1     | 5.08 | 7.10E-03 |
| P16401     | 5.00 | 1.02E-02 |
| Q15084     | 4.91 | 1.49E-04 |
| P27824     | 4.76 | 3.76E-04 |
| A0A075B6J9 | 4.76 | 7.37E-04 |
| Q9P1F3     | 4.72 | 7.76E-05 |
| A0A075B6K4 | 4.70 | 1.82E-02 |
| P29966     | 4.61 | 4.28E-04 |
| P0C0S8     | 4.61 | 4.29E-02 |
| P16189     | 4.52 | 5.87E-04 |
| O43707     | 4.46 | 1.44E-04 |
| P37837     | 4.46 | 1.12E-02 |
| Q9H3K6     | 4.45 | 1.23E-02 |
| Q92887     | 4.41 | 3.03E-04 |
| Q8WU39     | 4.38 | 1.37E-04 |
| P28908     | 4.36 | 3.74E-07 |
| P62805     | 4.35 | 2.03E-02 |
| P19652     | 4.32 | 2.83E-04 |
| Q9NUM4     | 4.30 | 3.03E-04 |
| P09923     | 4.25 | 1.35E-02 |
| Q9NRX4     | 4.22 | 2.14E-03 |
| O95980     | 4.19 | 2.49E-03 |
| P52272     | 4.17 | 2.43E-02 |
| P06681     | 4.08 | 3.53E-03 |
| A0A0C4DH24 | 4.06 | 1.67E-03 |
| A0A0B4J1V2 | 4.06 | 2.83E-04 |
| P01011     | 4.02 | 1.49E-04 |
| P36980     | 4.00 | 5.58E-04 |
| Q9Y274     | 3.93 | 1.37E-03 |
| P04211     | 3.89 | 8.42E-05 |
| P06899     | 3.89 | 4.18E-02 |
| P07384     | 3.85 | 8.02E-03 |
| P25311     | 3.78 | 7.08E-03 |
| O60234     | 3.77 | 7.52E-04 |

|            |      |          |
|------------|------|----------|
| P02545     | 3.74 | 3.42E-02 |
| P02741     | 3.71 | 2.26E-04 |
| P07451     | 3.66 | 1.90E-04 |
| P25815     | 3.64 | 2.08E-02 |
| A0A075B6P5 | 3.63 | 4.25E-02 |
| P54793     | 3.62 | 1.59E-03 |
| P26842     | 3.61 | 4.23E-04 |
| P35606     | 3.55 | 5.22E-05 |
| P0DOX6     | 3.54 | 1.81E-04 |
| P20333     | 3.53 | 9.04E-03 |
| P09972     | 3.53 | 2.28E-02 |
| P78423     | 3.52 | 2.03E-03 |
| P12104     | 3.49 | 1.74E-02 |
| Q15116     | 3.48 | 1.91E-05 |
| Q8N2U0     | 3.45 | 2.59E-03 |
| Q8WW52     | 3.45 | 3.86E-02 |
| Q14764     | 3.44 | 2.08E-04 |
| A0A075B6I0 | 3.44 | 2.65E-03 |
| A0A0C4DH68 | 3.43 | 1.69E-04 |
| P13797     | 3.43 | 8.85E-03 |
| A0A0C4DH25 | 3.42 | 4.12E-03 |
| O00754     | 3.37 | 5.82E-05 |
| P00747     | 3.37 | 1.06E-03 |
| Q8NHJ6     | 3.35 | 2.79E-04 |
| Q13421     | 3.35 | 1.41E-02 |
| P0DOX7     | 3.34 | 9.16E-04 |
| P00736     | 3.34 | 6.17E-04 |
| O75368     | 3.29 | 1.12E-03 |
| Q03591     | 3.29 | 2.41E-02 |
| Q9Y6X5     | 3.27 | 5.58E-04 |
| Q9NZT2     | 3.27 | 1.52E-02 |
| P04632     | 3.25 | 1.02E-02 |
| Q9BUH6     | 3.25 | 1.04E-03 |
| O75531     | 3.24 | 8.01E-04 |
| P25774     | 3.24 | 4.06E-04 |
| P01593     | 3.23 | 2.38E-03 |
| P01871     | 3.17 | 1.28E-03 |
| A2NJV5     | 3.16 | 1.67E-03 |
| O96009     | 3.14 | 1.04E-03 |
| P01877     | 3.13 | 7.22E-04 |
| Q96FW1     | 3.11 | 2.37E-02 |
| P26447     | 3.11 | 4.15E-02 |
| A0A0C4DH38 | 3.09 | 2.63E-03 |
| P20774     | 3.02 | 2.03E-03 |
| Q13113     | 3.01 | 8.01E-04 |

|                            |      |          |
|----------------------------|------|----------|
| Q6UWV6                     | 2.99 | 5.58E-04 |
| P01601                     | 2.95 | 3.72E-02 |
| P21796                     | 2.94 | 2.14E-03 |
| Q03167                     | 2.92 | 2.60E-03 |
| A0A0B4J1Y9                 | 2.91 | 1.80E-02 |
| O00584                     | 2.88 | 1.05E-03 |
| P14324                     | 2.83 | 4.73E-02 |
| Q9BTY2                     | 2.83 | 7.25E-04 |
| A0A087WW87                 | 2.81 | 2.74E-02 |
| P06331                     | 2.80 | 2.49E-03 |
| P04217                     | 2.78 | 2.38E-02 |
| P54803                     | 2.74 | 3.67E-04 |
| ENSEMBL:ENSBTAP00000007350 | 2.73 | 9.08E-03 |
| P11279                     | 2.73 | 3.29E-03 |
| Q6UWR7                     | 2.72 | 2.30E-02 |
| P28070                     | 2.72 | 3.29E-03 |
| A0A0A0MRZ8                 | 2.72 | 8.45E-03 |
| P60900                     | 2.70 | 5.56E-03 |
| Q96C19                     | 2.68 | 1.79E-02 |
| P08670                     | 2.68 | 3.78E-02 |
| P15144                     | 2.67 | 3.92E-02 |
| P00450                     | 2.66 | 4.07E-03 |
| P01019                     | 2.65 | 8.01E-04 |
| P14151                     | 2.62 | 2.23E-03 |
| Q86VB7                     | 2.59 | 1.49E-04 |
| P36639                     | 2.58 | 3.90E-03 |
| P25789                     | 2.56 | 3.01E-03 |
| Q8TCD5                     | 2.56 | 3.53E-03 |
| P01876                     | 2.56 | 1.61E-02 |
| O60361                     | 2.55 | 3.70E-04 |
| P04075                     | 2.55 | 2.30E-02 |
| P29401                     | 2.55 | 9.04E-03 |
| P27105                     | 2.54 | 7.34E-03 |
| Q9UHY7                     | 2.53 | 3.91E-03 |
| P0DOX5                     | 2.52 | 2.29E-04 |
| P08195                     | 2.51 | 7.56E-03 |
| P26368                     | 2.50 | 9.81E-03 |
| Q8NFQ8                     | 2.47 | 2.30E-02 |
| P15531                     | 2.46 | 2.85E-04 |
| P36969                     | 2.44 | 1.31E-04 |
| P20618                     | 2.44 | 3.41E-02 |
| Q8NCC3                     | 2.43 | 4.14E-03 |
| P36222                     | 2.40 | 8.85E-03 |
| P01780                     | 2.40 | 1.46E-03 |
| O60814                     | 2.38 | 8.35E-03 |

|            |      |          |
|------------|------|----------|
| P30101     | 2.37 | 3.40E-02 |
| P01591     | 2.37 | 1.02E-02 |
| Q8NBS9     | 2.34 | 1.07E-03 |
| Q9BXS4     | 2.34 | 1.89E-02 |
| Q8WWB7     | 2.34 | 2.86E-03 |
| P25786     | 2.32 | 1.59E-03 |
| Q92626     | 2.32 | 1.63E-03 |
| P04066     | 2.31 | 1.13E-03 |
| O95998     | 2.31 | 3.97E-03 |
| A0A0C4DH29 | 2.30 | 2.64E-02 |
| Q8TDQ1     | 2.28 | 7.51E-03 |
| Q99571     | 2.28 | 2.32E-02 |
| A0A0A0MS15 | 2.28 | 1.47E-02 |
| O00499     | 2.27 | 1.56E-02 |
| P01344     | 2.26 | 1.83E-02 |
| P02749     | 2.25 | 4.73E-02 |
| P05091     | 2.24 | 3.47E-02 |
| P15586     | 2.23 | 4.94E-04 |
| P09871     | 2.23 | 7.23E-04 |
| P81605     | 2.21 | 3.55E-02 |
| P28066     | 2.20 | 4.12E-03 |
| Q9BTM9     | 2.20 | 1.77E-02 |
| P27487     | 2.19 | 7.37E-03 |
| Q9UBR2     | 2.17 | 2.92E-05 |
| A0A075B6Q5 | 2.17 | 3.11E-02 |
| P21217     | 2.16 | 2.60E-02 |
| P08571     | 2.16 | 4.16E-02 |
| P17050     | 2.13 | 3.97E-03 |
| O14818     | 2.12 | 6.98E-03 |
| Q13867     | 2.11 | 2.73E-02 |
| P13798     | 2.11 | 1.27E-02 |
| P05981     | 2.11 | 7.23E-04 |
| Q03405     | 2.10 | 3.62E-02 |
| P08236     | 2.07 | 1.49E-02 |
| P05155     | 2.07 | 4.96E-03 |
| Q02985     | 2.06 | 3.29E-03 |
| P02511     | 2.03 | 4.16E-02 |
| Q9BXJ7     | 2.01 | 3.11E-02 |
| Q96CX2     | 2.00 | 3.52E-02 |
| P09619     | 0.50 | 2.30E-02 |
| P43121     | 0.50 | 1.27E-02 |
| Q9BQ51     | 0.49 | 4.63E-03 |
| Q6UX71     | 0.49 | 1.56E-02 |
| Q9HBR0     | 0.48 | 2.31E-02 |
| Q92859     | 0.47 | 1.83E-02 |

|        |      |          |
|--------|------|----------|
| O75144 | 0.47 | 3.54E-02 |
| P55899 | 0.46 | 3.56E-02 |
| Q86VN1 | 0.45 | 3.61E-02 |
| Q9Y4D7 | 0.44 | 4.09E-02 |
| P29323 | 0.44 | 4.50E-03 |
| Q15223 | 0.44 | 1.45E-02 |
| P30086 | 0.44 | 3.56E-02 |
| Q8WUM4 | 0.43 | 3.78E-02 |
| P21709 | 0.43 | 3.67E-02 |
| Q8N386 | 0.42 | 1.24E-02 |
| P07195 | 0.41 | 4.83E-02 |
| P00568 | 0.41 | 2.50E-02 |
| P41217 | 0.41 | 4.65E-02 |
| P40189 | 0.41 | 3.78E-02 |
| Q6UXG3 | 0.41 | 4.08E-02 |
| Q9NQS3 | 0.41 | 9.29E-03 |
| P10586 | 0.40 | 2.52E-03 |
| P24855 | 0.40 | 3.11E-02 |
| Q9BWV1 | 0.40 | 4.73E-02 |
| P13598 | 0.39 | 2.30E-02 |
| P22304 | 0.39 | 2.78E-02 |
| Q07507 | 0.39 | 7.72E-03 |
| P30530 | 0.38 | 1.30E-03 |
| P0DMQ5 | 0.38 | 3.93E-02 |
| Q04760 | 0.37 | 3.10E-02 |
| Q05707 | 0.37 | 3.10E-02 |
| Q9H0X4 | 0.37 | 3.05E-02 |
| Q9H4M9 | 0.37 | 9.37E-03 |
| P0C7U0 | 0.36 | 4.16E-02 |
| O94760 | 0.36 | 2.10E-02 |
| Q8N5I2 | 0.36 | 4.96E-02 |
| P10768 | 0.36 | 4.89E-02 |
| Q9ULK6 | 0.36 | 4.71E-02 |
| Q8TBP5 | 0.35 | 4.15E-02 |
| Q9Y5E6 | 0.35 | 2.05E-02 |
| P14784 | 0.35 | 3.78E-02 |
| Q9UBG0 | 0.34 | 5.14E-03 |
| P07741 | 0.34 | 4.12E-02 |
| P25940 | 0.34 | 2.15E-02 |
| Q96MU8 | 0.33 | 3.79E-02 |
| P19256 | 0.33 | 1.62E-02 |
| Q9NP85 | 0.33 | 3.67E-02 |
| Q9UNN8 | 0.32 | 1.51E-03 |
| Q8IUL8 | 0.32 | 3.11E-02 |
| P50148 | 0.31 | 4.80E-02 |



|        |      |          |
|--------|------|----------|
| Q6YHK3 | 0.30 | 4.83E-02 |
| Q9Y639 | 0.30 | 4.32E-02 |
| Q96RW7 | 0.30 | 3.79E-02 |
| Q13443 | 0.29 | 2.60E-02 |
| P35555 | 0.29 | 3.78E-02 |
| P26992 | 0.29 | 3.25E-02 |
| P11362 | 0.29 | 4.25E-02 |
| P05556 | 0.27 | 3.78E-02 |
| P11047 | 0.26 | 5.14E-03 |
| P22105 | 0.25 | 2.56E-02 |
| P82980 | 0.25 | 3.06E-02 |
| Q9HCU0 | 0.25 | 1.14E-02 |
| P09486 | 0.25 | 1.73E-02 |
| Q9Y6N8 | 0.24 | 2.85E-02 |
| O43921 | 0.23 | 1.67E-02 |
| P48745 | 0.22 | 3.87E-02 |
| A1L4H1 | 0.22 | 4.16E-02 |
| Q96JQ0 | 0.20 | 5.14E-03 |
| P98095 | 0.17 | 4.83E-02 |
| P80370 | 0.15 | 3.47E-02 |
| Q9HCM3 | 0.13 | 3.68E-03 |
| Q9H1U4 | 0.11 | 1.04E-02 |
| O75339 | 0.11 | 9.81E-03 |
| Q8NDA2 | 0.10 | 1.84E-02 |
| P55017 | 0.10 | 1.49E-02 |
| P10721 | 0.09 | 3.67E-02 |

| <b>group analysis ( FOU &amp; healthy people)</b> |                    |                |
|---------------------------------------------------|--------------------|----------------|
| <b>Protein Accessions</b>                         | <b>Fold Change</b> | <b>P value</b> |
| P02792                                            | 6.18               | 3.08E-02       |
| Q07075                                            | 4.47               | 2.63E-02       |
| O00754                                            | 3.97               | 3.07E-02       |
| Q9NUM4                                            | 3.66               | 9.87E-03       |
| P02656                                            | 3.62               | 1.25E-02       |
| P02741                                            | 3.51               | 3.21E-02       |
| Q7L5L3                                            | 3.46               | 4.39E-02       |
| P25774                                            | 3.33               | 4.04E-03       |
| Q9UHI7                                            | 2.84               | 4.22E-02       |
| Q9BTY2                                            | 2.81               | 1.92E-02       |
| Q8NCC3                                            | 2.68               | 9.95E-03       |
| P53634                                            | 2.60               | 4.56E-02       |
| O96009                                            | 2.55               | 4.22E-02       |
| P04066                                            | 2.53               | 4.89E-02       |
| P07858                                            | 2.35               | 4.46E-02       |
| P17050                                            | 2.30               | 1.01E-02       |
| P00450                                            | 2.16               | 2.95E-02       |
| P06865                                            | 2.16               | 3.41E-02       |
| Q13510                                            | 2.06               | 3.44E-02       |
| P10619                                            | 2.03               | 3.39E-02       |
| O15197                                            | 0.50               | 1.47E-02       |
| Q86UD1                                            | 0.50               | 2.10E-02       |
| Q7KYR7                                            | 0.50               | 2.62E-03       |
| Q9H8L6                                            | 0.50               | 4.52E-02       |
| Q8TBP5                                            | 0.50               | 4.63E-03       |
| P14784                                            | 0.50               | 5.47E-03       |
| P29622                                            | 0.50               | 4.38E-02       |
| Q9UBQ6                                            | 0.49               | 1.19E-02       |
| Q5VW32                                            | 0.49               | 2.85E-02       |
| Q8NFZ8                                            | 0.49               | 1.65E-02       |
| P54753                                            | 0.49               | 1.09E-02       |
| Q9NP85                                            | 0.49               | 3.53E-03       |
| Q9Y2G1                                            | 0.49               | 7.29E-03       |
| P04745                                            | 0.49               | 4.53E-02       |
| Q9Y639                                            | 0.49               | 6.68E-03       |
| Q7Z7G0                                            | 0.49               | 1.21E-02       |
| Q99574                                            | 0.49               | 3.70E-02       |

|        |      |          |
|--------|------|----------|
| Q7LBR1 | 0.48 | 1.18E-02 |
| Q9H444 | 0.48 | 3.69E-02 |
| Q6UXI9 | 0.48 | 2.64E-02 |
| P35858 | 0.48 | 1.88E-02 |
| Q6UXD5 | 0.48 | 8.35E-03 |
| Q13443 | 0.48 | 5.01E-03 |
| P16035 | 0.48 | 6.02E-03 |
| O75131 | 0.48 | 3.87E-02 |
| Q13591 | 0.48 | 5.30E-03 |
| P09619 | 0.47 | 4.00E-04 |
| Q86YT9 | 0.47 | 2.99E-03 |
| Q9UQV4 | 0.47 | 4.16E-02 |
| Q13477 | 0.47 | 2.14E-02 |
| Q09328 | 0.47 | 1.30E-02 |
| Q03403 | 0.47 | 4.57E-02 |
| Q9UPZ6 | 0.47 | 2.37E-02 |
| Q8WVQ1 | 0.47 | 2.90E-02 |
| P17342 | 0.47 | 1.88E-02 |
| P08582 | 0.46 | 1.18E-02 |
| P22607 | 0.46 | 9.87E-03 |
| Q6V0I7 | 0.46 | 1.01E-02 |
| Q53RD9 | 0.46 | 2.43E-02 |
| Q15303 | 0.46 | 1.63E-02 |
| P11362 | 0.45 | 2.74E-03 |
| O14594 | 0.45 | 1.92E-02 |
| Q5IJ48 | 0.45 | 3.95E-03 |
| P41217 | 0.45 | 9.61E-03 |
| Q9ULK6 | 0.45 | 2.62E-03 |
| Q9UKY0 | 0.45 | 1.10E-02 |
| P21926 | 0.44 | 9.99E-03 |
| P15151 | 0.44 | 5.67E-04 |
| Q96RW7 | 0.44 | 1.32E-03 |
| Q14574 | 0.44 | 1.47E-02 |
| Q9UBG0 | 0.44 | 8.43E-05 |
| P12273 | 0.44 | 3.91E-02 |
| P13598 | 0.44 | 7.25E-05 |
| P42702 | 0.43 | 3.08E-02 |
| P24855 | 0.43 | 7.97E-04 |
| Q8TB96 | 0.43 | 7.89E-04 |

|        |      |          |
|--------|------|----------|
| P19961 | 0.43 | 1.90E-02 |
| O75144 | 0.42 | 1.29E-04 |
| Q9UNN8 | 0.42 | 1.48E-05 |
| P98095 | 0.42 | 1.64E-02 |
| Q6UXG3 | 0.42 | 5.81E-04 |
| Q8WZ75 | 0.41 | 1.47E-02 |
| Q9H9P2 | 0.41 | 2.99E-03 |
| P19256 | 0.41 | 1.26E-04 |
| Q14982 | 0.41 | 1.88E-02 |
| Q9NQS3 | 0.41 | 1.77E-05 |
| Q6UVK1 | 0.41 | 6.85E-03 |
| P01042 | 0.41 | 3.53E-03 |
| O94856 | 0.41 | 3.88E-03 |
| Q9P121 | 0.41 | 1.79E-02 |
| Q96DR8 | 0.41 | 3.61E-02 |
| Q8IUL8 | 0.40 | 1.92E-03 |
| Q8TER0 | 0.39 | 4.69E-03 |
| Q9BUN1 | 0.39 | 1.92E-02 |
| Q9UNE0 | 0.39 | 6.95E-03 |
| Q96NY8 | 0.39 | 2.54E-04 |
| Q8IUK5 | 0.39 | 2.92E-02 |
| P14384 | 0.39 | 4.59E-03 |
| Q16849 | 0.38 | 4.22E-02 |
| Q9H159 | 0.38 | 1.47E-02 |
| Q9NPG4 | 0.38 | 4.52E-02 |
| P06870 | 0.38 | 2.19E-02 |
| P0C7U0 | 0.38 | 7.93E-04 |
| P05154 | 0.38 | 6.07E-03 |
| Q92859 | 0.38 | 7.25E-05 |
| Q04756 | 0.38 | 8.60E-03 |
| P10912 | 0.38 | 9.61E-03 |
| Q9BY67 | 0.38 | 7.93E-04 |
| P26992 | 0.37 | 2.78E-04 |
| P11047 | 0.37 | 2.78E-04 |
| Q68CJ9 | 0.36 | 4.79E-03 |
| Q8NFT8 | 0.36 | 8.58E-03 |
| P50995 | 0.35 | 4.06E-02 |
| Q96JQ0 | 0.35 | 7.25E-05 |
| Q9HCU0 | 0.35 | 2.21E-04 |

|        |      |          |
|--------|------|----------|
| Q6UY11 | 0.35 | 7.97E-04 |
| P23327 | 0.34 | 2.62E-03 |
| P01133 | 0.34 | 1.83E-02 |
| P22891 | 0.34 | 1.88E-02 |
| Q9H1U4 | 0.34 | 4.58E-04 |
| Q9UN70 | 0.34 | 9.95E-03 |
| P55083 | 0.33 | 8.79E-03 |
| P80370 | 0.32 | 7.89E-04 |
| P31997 | 0.31 | 2.62E-03 |
| Q5VY43 | 0.31 | 6.35E-03 |
| P39059 | 0.30 | 3.53E-03 |
| O75339 | 0.29 | 7.25E-05 |
| Q8NDA2 | 0.23 | 7.25E-05 |
| O43852 | 0.07 | 2.74E-03 |
